# Supplementary material for: Helicity control of a polyaromatic coordination capsule through stereoselective CH–π interactions
Source: Royal Society of Chemistry journal article supplement (doi:10.1039/d4sc02103g), 2024-01-01
Supplement: d4sc02103g1.pdf [file d4sc02103g1.pdf]

## Supporting Information

### Helicity Control of a Polyaromatic Coordination Capsule through Stereoselective CH- $\pi$ Interactions

Natsuki Kishida, Hayate Sasafuchi, Tomohisa Sawada, and Michito Yoshizawa\*

Laboratory for Chemistry and Life Science, Institute of Innovative Research, Tokyo Institute of Technology, 4259 Nagatsuta, Midori-ku, Yokohama 226-8503, Japan

#### Contents

- Materials and methods, and references
- Synthesis of compound **3<sub>Cl</sub>** (<sup>1</sup>H & <sup>13</sup>C NMR and MS spectra)
- Synthesis of compound **3<sub>I</sub>** (<sup>1</sup>H & <sup>13</sup>C NMR and MS spectra)
- Synthesis of ligand **2** (<sup>1</sup>H & <sup>13</sup>C NMR, COSY, HSQC, and MS spectra)
- Formation of **1** (<sup>1</sup>H & <sup>13</sup>C NMR, HSQC, and MS spectra)
- Formation of **1• $\alpha$ Glc<sup>Me</sup>**, **1• $\beta$ Glc<sup>Me</sup>**, **1• $\alpha$ Gal<sup>Me</sup>**, **1• $\beta$ Gal<sup>Me</sup>**, **1• $\alpha$ Man<sup>Me</sup>**, and **1•Fru<sup>Me</sup>** (<sup>1</sup>H NMR, HSQC, and/or NOESY spectra)
- Formation of **1''• $\alpha$ Glc<sup>Me</sup>** (<sup>1</sup>H NMR and MS spectra)
- Competitive binding experiments
- UV-visible and CD spectra of **1• $\alpha$ Gal<sup>Me</sup>**, **1• $\beta$ Gal<sup>Me</sup>**, **1• $\alpha$ Man<sup>Me</sup>**, and **1•Fru<sup>Me</sup>**
- Theoretical studies of (*P*)/(*M*)-**1** and (*P*)/(*M*)-**1• $\alpha$ Glc<sup>Me</sup>**
- EXSY NMR spectra of **1• $\beta$ Gal<sup>Me</sup>**

## Materials and methods

NMR: Bruker AVANCE-HD500 (500 MHz), MALDI-TOF MS: Bruker ultrafleXtreme, ESI-TOF MS: Bruker micrOTOF II, UV-visible: JASCO V-670DS, FT-IR: SHIMADZU IRSpirit-T, CD: JASCO J-820.

Solvents and reagents: TCI Co., Ltd., FUJIFILM Wako Chemical Co., Kanto Chemical Co., Inc., Sigma-Aldrich Co., and Cambridge Isotope Laboratories, Inc. Compounds: Compound **3**<sub>MOE</sub>, capsule **1**'', pentamethylated  $\alpha/\beta$ -D-glucose mixture (1:4) and fructose were synthesized according to ref. S1, S2, and S3, respectively.

## Calculations

DFT calculation: Gaussian 16 program (Rev. C.01) package, Molecular mechanics calculation: Forcite module, BIOVIA Materials Studio 2020, version 20.1.0.5 (Dassault Systèmes Co.), NCI analysis: NCIPLLOT 4.0, Calculations: DFT and TD-DFT calculations of capsule **1** (R = H) and its host-guest complexes were performed for the geometry optimizations (CAM-B3LYP/LanL2DZ (Pd), 6-31G(d,p) (others) level of theory).

## References

- [S1] N. Kishida, K. Matsumoto, Y. Tanaka, M. Akita, H. Sakurai, M. Yoshizawa, *J. Am. Chem. Soc.* **2020**, *142*, 9599–9603.
- [S2] N. Kishida, Y. Tanaka, M. Yoshizawa, *Chem. Eur. J.* **2022**, *28*, e202202075.
- [S3] Z. R. Laughrey, S. E. Kiehna, A. J. Riemen, M. L. Waters, *J. Am. Chem. Soc.* **2008**, *130*, 14625–14633.
- [S4] C. L. D. Gibb, B. C. Gibb, *J. Am. Chem. Soc.* **2004**, *126*, 11408–11409.
- [S5] M. Yamashina, S. Matsuno, Y. Sei, M. Akita, M. Yoshizawa, *Chem. Eur. J.* **2016**, *22*, 14147–14150.

### Synthesis of compound **3<sub>Cl</sub>**

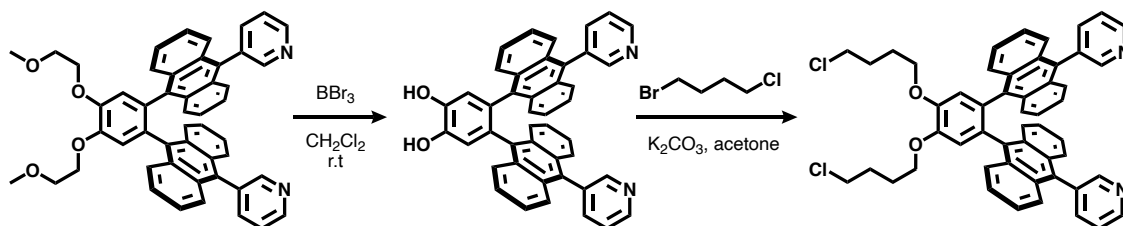

Compound **3<sub>MOE</sub>** (0.113 g, 0.154 mmol) was added to a 100 mL glass flask filled with N<sub>2</sub>. Dry CH<sub>2</sub>Cl<sub>2</sub> (40 mL) was added to the flask. A 1 M CH<sub>2</sub>Cl<sub>2</sub> solution of BBr<sub>3</sub> (2.1 mL, 2.1 mmol) was added to the flask at 0 °C, and then the mixture was stirred at r.t. for 3 h. After addition of H<sub>2</sub>O (30 mL), the mixture was neutralized by adding 1N NaOH aq. The product was extracted with CH<sub>2</sub>Cl<sub>2</sub>, and then the obtained organic layer was dried over MgSO<sub>4</sub>, filtrated, and concentrated under reduced pressure to afford crude **3<sub>OH</sub>** (94.8 mg, 0.154 mmol, 100%) as a brown solid.

Compound **3<sub>OH</sub>** (94.8 mg, 0.154 mmol) and K<sub>2</sub>CO<sub>3</sub> (0.503 g, 3.64 mmol) were added to a 100 mL glass flask filled with N<sub>2</sub>. Dry acetone (20 mL) was added to the flask, and then the mixture was stirred at 70 °C for 30 min. After an acetone solution (15 mL) of 1-bromo-4-chlorobutane (0.252 g, 1.47 mmol) was added to the flask, the mixture was stirred at 70 °C overnight. The mixture was concentrated under reduced pressure. The product was extracted with CH<sub>2</sub>Cl<sub>2</sub> and the obtained organic layer was dried over Na<sub>2</sub>SO<sub>4</sub>, filtrated, and concentrated under reduced pressure. The obtained crude product was purified by GPC (CHCl<sub>3</sub>) to afford ligand **3<sub>Cl</sub>** (73.4 mg, 92.0 μmol, 60%) as a yellow solid. **3<sub>OH</sub>**: <sup>1</sup>H NMR (400 MHz, CD<sub>3</sub>OD, after the addition of conc. HCl aq. (one drop), r.t.): δ 8.94-8.89 (m, 2H), 8.75 (s, 1H), 8.33-8.30 (m, 2H), 8.15-8.07 (m, 7H), 7.24-7.12 (m, 14H).

**3<sub>Cl</sub>**: <sup>1</sup>H NMR (400 MHz, CDCl<sub>3</sub>, r.t.): δ 8.68 (m, 2H), 8.49-8.48 (m, 1H), 8.04 (br, 1H), 7.99-7.89 (m, 4H), 7.58 (dd, *J* = 7.9 Hz, 1H), 7.44-7.39 (m, 4H), 7.21-7.14 (m, 5H), 7.06-7.02 (m, 4H), 6.99-6.92 (m, 4H), 4.24 (br, 4H), 3.76 (br, 4H), 2.13 (br, 4H). <sup>13</sup>C NMR (100 MHz, CDCl<sub>3</sub>, r.t.): δ 151.4 (CH), 148.6 (CH), 148.2 (C<sub>q</sub>), 138.6 (CH), 136.4 (C<sub>q</sub>), 134.8 (C<sub>q</sub>), 132.5 (C<sub>q</sub>), 131.7 (C<sub>q</sub>), 129.6 (C<sub>q</sub>), 129.4 (C<sub>q</sub>), 127.8-127.6 (CH), 125.5 (CH), 124.9 (CH), 124.0 (CH), 123.1 (CH), 118.0 (CH), 68.6 (CH<sub>2</sub>), 44.9 (CH<sub>2</sub>), 29.7 (CH<sub>2</sub>), 26.8 (CH<sub>2</sub>). FT-IR (ATR, cm<sup>-1</sup>): 2961, 1487, 1440, 1393, 1262, 1240, 1225, 1157, 1091, 1053, 1027, 911, 807, 767, 717, 687, 613, 419. HR MS (ESI, CH<sub>3</sub>OH): *m/z* Calcd. for C<sub>52</sub>H<sub>43</sub>Cl<sub>2</sub>N<sub>2</sub>O<sub>2</sub> 797.2696 [M + H]<sup>+</sup>, Found 797.2695.

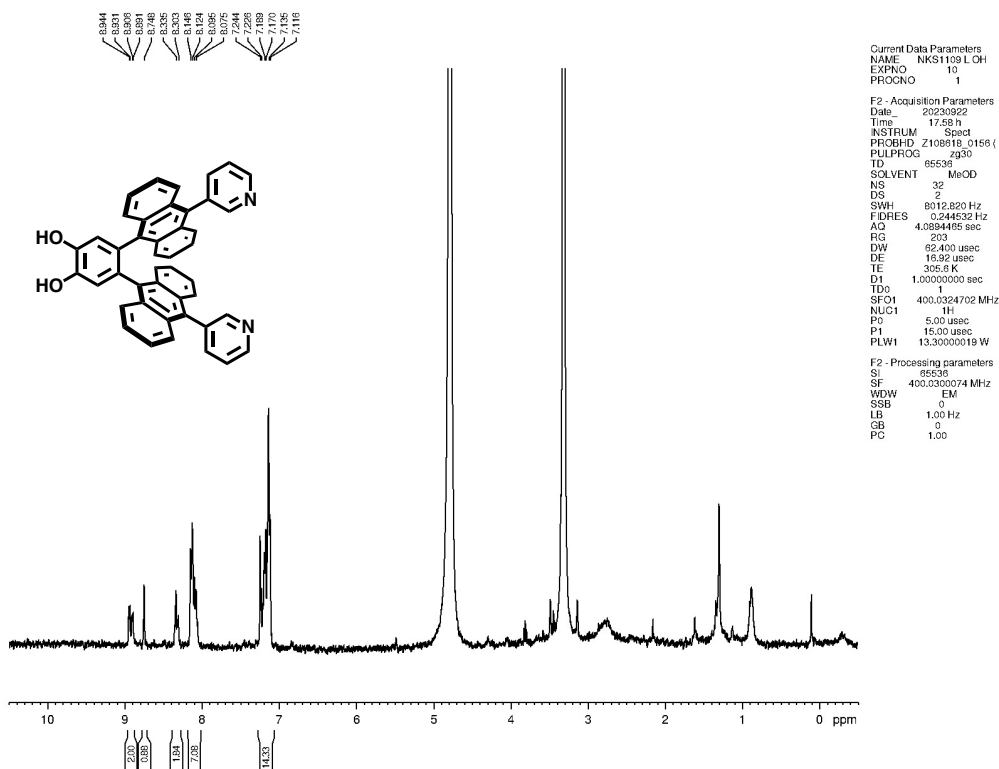

**Figure S1.** <sup>1</sup>H NMR spectrum (500 MHz, CD<sub>3</sub>OD, r.t., after the addition of conc. HCl aq. (one drop)) of **3<sub>OH</sub>**.

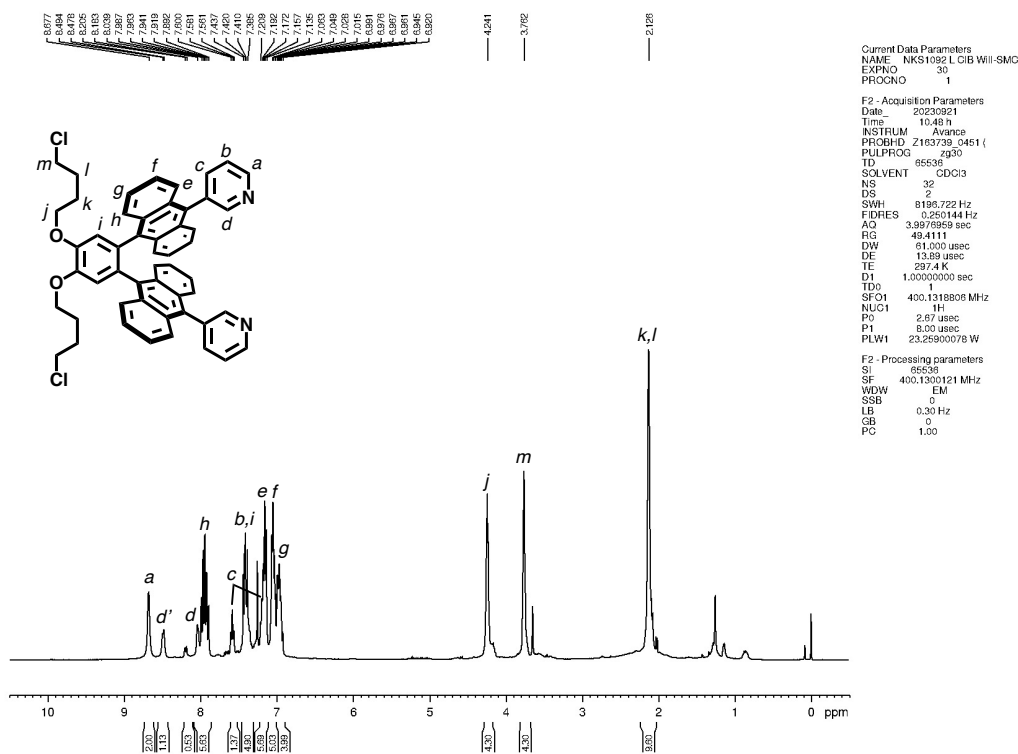

**Figure S2.** <sup>1</sup>H NMR spectrum (400 MHz, CDCl<sub>3</sub>, r.t.) of **3<sub>Cl</sub>**.



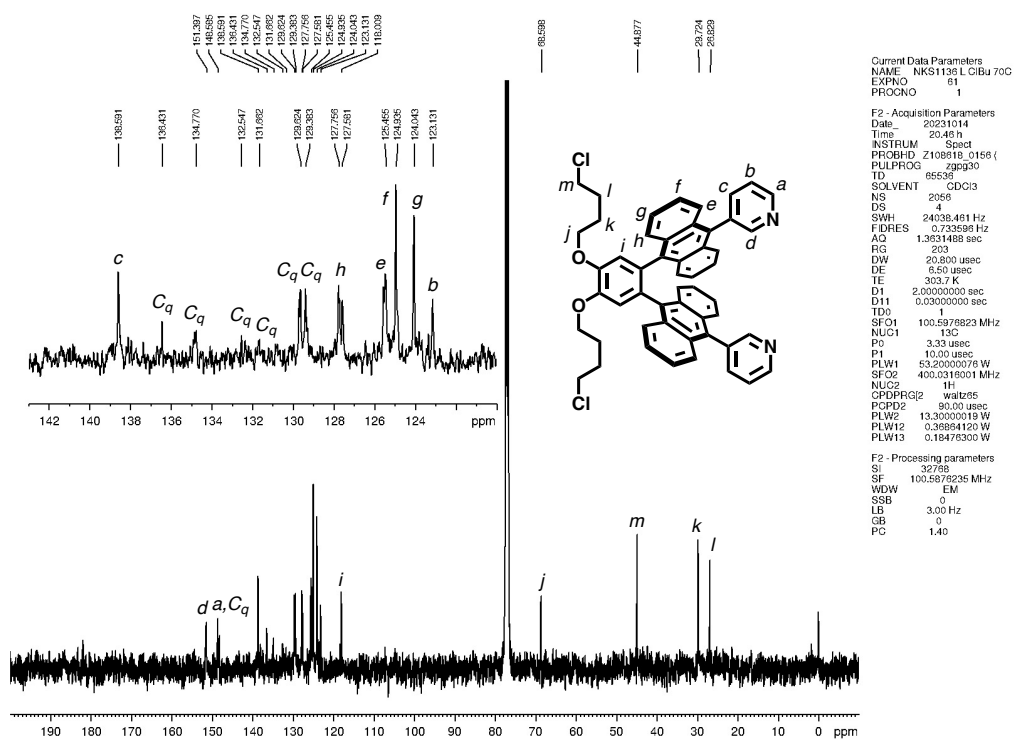

Figure S3.  $^{13}\text{C}$  NMR spectrum (100 MHz,  $\text{CDCl}_3$ , r.t.) of **3c1**.

## Display Report

### Analysis Info

Analysis Name D:\Data\akita\18kishida\1136 L ClBu HR\Acq000001.d  
Method esi\_posi\_wide.m  
Sample Name 1  
Comment

Acquisition Date 2023/10/13 15:36:19

Operator BDAL@DE  
Instrument micrOTOF 213750.10321

### Acquisition Parameter

|             |            |                      |          |                  |           |
|-------------|------------|----------------------|----------|------------------|-----------|
| Source Type | ESI        | Ion Polarity         | Positive | Set Nebulizer    | 0.3 Bar   |
| Focus       | Not active |                      |          | Set Dry Heater   | 180 °C    |
| Scan Begin  | 50 m/z     | Set Capillary        | 2700 V   | Set Dry Gas      | 4.0 l/min |
| Scan End    | 3000 m/z   | Set End Plate Offset | -500 V   | Set Divert Valve | Waste     |

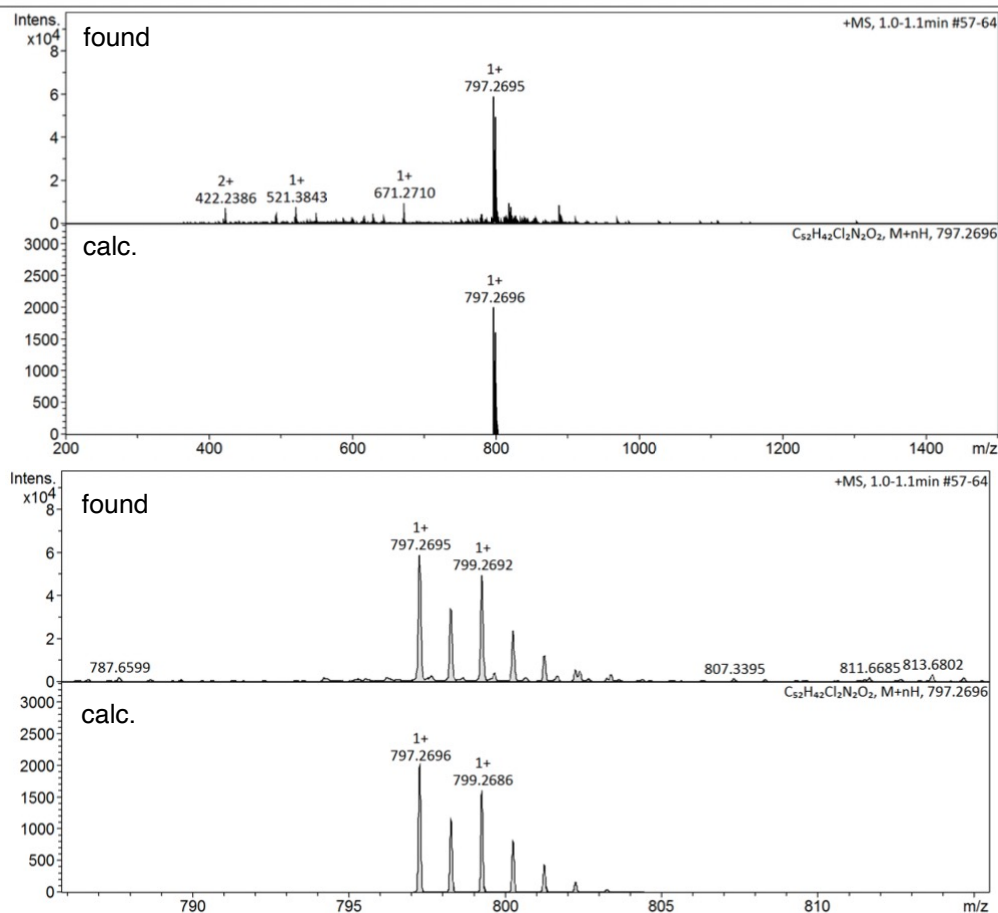

Figure S4. HR MS spectrum (ESI, CH<sub>3</sub>OH) of 3<sub>Cl</sub>.

### Synthesis of compound 3

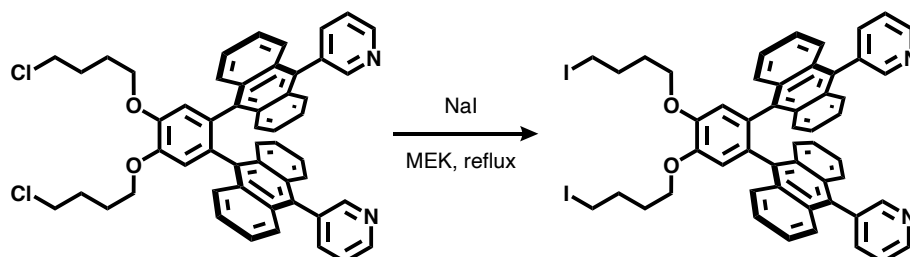

Compound 3<sub>Cl</sub> (163 mg, 0.205 mmol), sodium iodide (1.23 g, 8.20 mmol), and dry methyl ethyl ketone (MEK; 40 mL) were added to a 200 mL glass flask filled with N<sub>2</sub>, and then the mixture was stirred at 85 °C overnight. The reaction mixture was

concentrated under reduced pressure. After addition of water, the crude product was extracted with CH<sub>2</sub>Cl<sub>2</sub>. The obtained organic layer was dried over Na<sub>2</sub>SO<sub>4</sub>, filtrated, and concentrated under reduced pressure. The crude product was purified by GPC (CHCl<sub>3</sub>) to afford **3<sub>I</sub>** (99.9 mg, 0.102 mmol, 50%) as a yellow solid.

<sup>1</sup>H NMR (100 MHz, CDCl<sub>3</sub>, r.t.): δ 8.68 (br, 2H), 8.50-8.48 (m, 1H), 8.04 (br, 1H), 7.98-7.89 (m, 4H), 7.58 (m, 1H), 7.44-7.37 (m, 4H), 7.18-7.13 (m, 5H), 7.07-7.01 (m, 4H), 6.99-6.92 (m, 4H), 4.24 (t, *J* = 5.0 Hz, 4H), 3.42 (t, *J* = 6.8 Hz, 4H), 2.22-2.09 (m, 8H).

<sup>13</sup>C NMR (125 MHz, CDCl<sub>3</sub>, r.t.): δ 151.6-151.5 (CH), 148.7-148.6 (CH), 148.2-148.1 (C<sub>q</sub>), 138.6-138.4 (CH), 136.4-136.2 (C<sub>q</sub>), 134.8-134.7 (C<sub>q</sub>), 132.6-132.3 (C<sub>q</sub>), 131.9-131.7 (C<sub>q</sub>), 129.7-129.6 (C<sub>q</sub>), 129.4 (C<sub>q</sub>), 127.8-127.6 (CH), 125.6-125.4 (CH), 125.0 (CH), 124.1 (CH), 123.3-123.0 (CH), 118.0 (CH), 68.3 (CH<sub>2</sub>), 30.7 (CH<sub>2</sub>), 30.3 (CH<sub>2</sub>), 6.7 (CH<sub>2</sub>). FT-IR (ATR, cm<sup>-1</sup>): 2924, 1514, 1440, 1386, 1243, 1198, 1156, 1091, 1027, 928, 809, 769, 718, 687, 614, 419. HR MS (ESI, CH<sub>3</sub>OH): *m/z* Calcd. for C<sub>52</sub>H<sub>43</sub>I<sub>2</sub>N<sub>2</sub>O<sub>2</sub> 981.1409 [M + H]<sup>+</sup>, Found 981.1413.

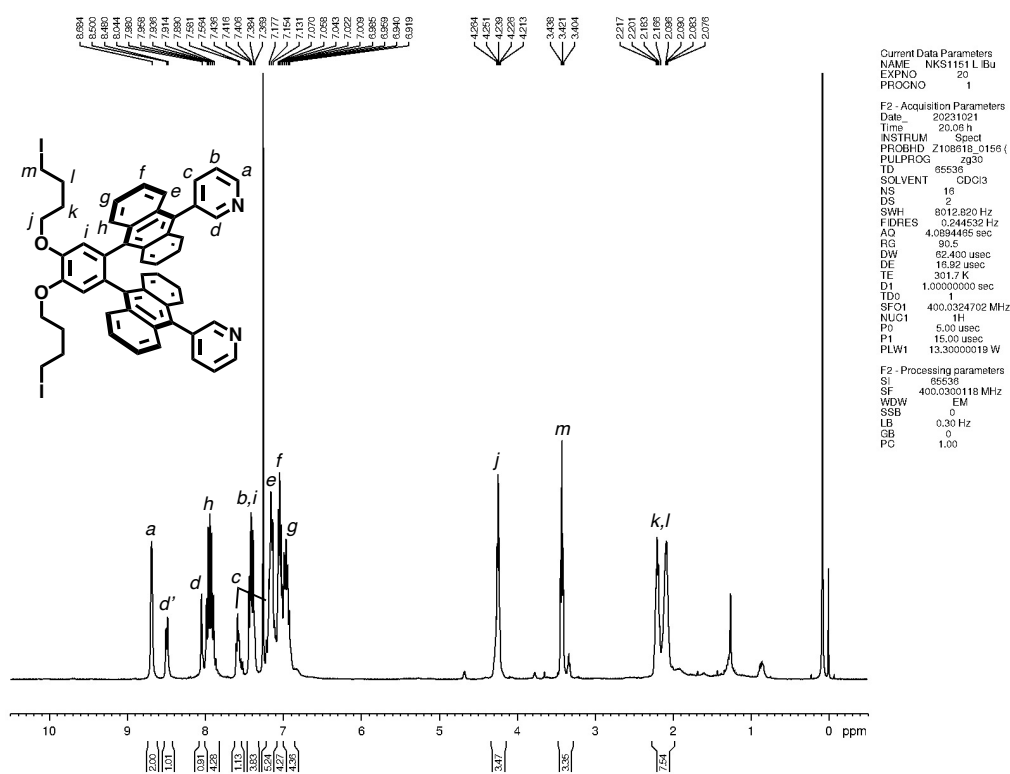

Figure S5. <sup>1</sup>H NMR spectrum (400 MHz, CDCl<sub>3</sub>, r.t.) of **3<sub>I</sub>**.

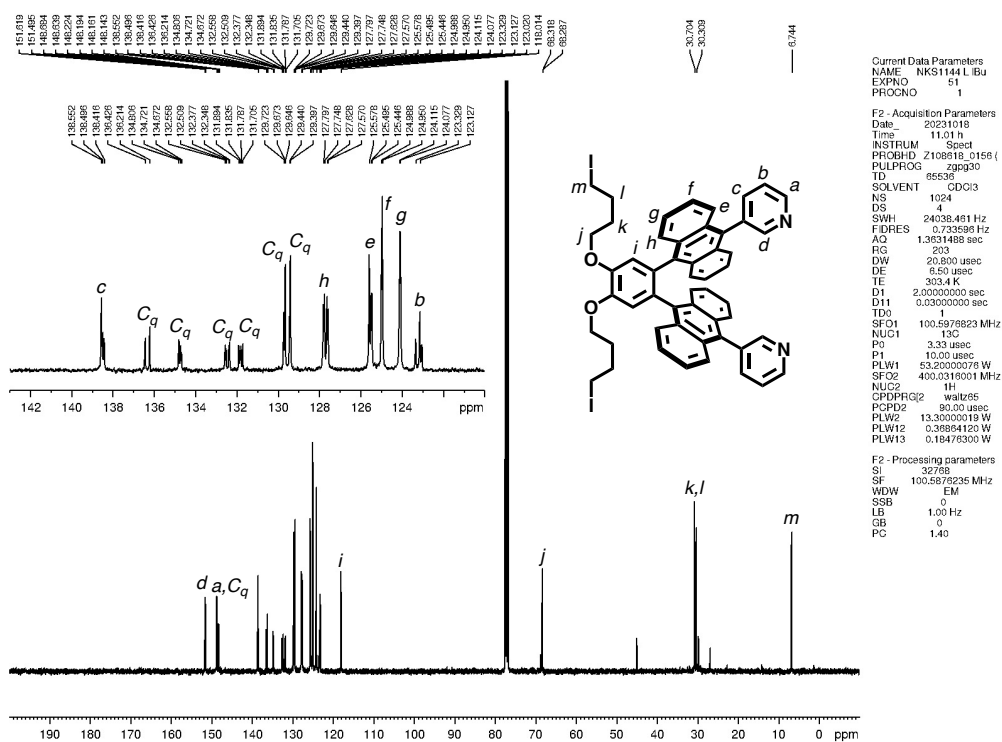

Figure S6.  $^{13}\text{C}$  NMR spectrum (100 MHz,  $\text{CDCl}_3$ , r.t.) of **3f**.

## Display Report

### Analysis Info

Analysis Name D:\Data\akita\18kishida\1151 IBu HR\Acq000001.d  
 Method esi\_posi\_high.m  
 Sample Name 1  
 Comment

Acquisition Date 2023/10/24 14:25:16

Operator BDAL@DE  
 Instrument micrOTOF 213750.10321

### Acquisition Parameter

|             |            |                      |          |                  |           |
|-------------|------------|----------------------|----------|------------------|-----------|
| Source Type | ESI        | Ion Polarity         | Positive | Set Nebulizer    | 0.3 Bar   |
| Focus       | Not active |                      |          | Set Dry Heater   | 180 °C    |
| Scan Begin  | 50 m/z     | Set Capillary        | 4500 V   | Set Dry Gas      | 4.0 l/min |
| Scan End    | 3000 m/z   | Set End Plate Offset | -500 V   | Set Divert Valve | Waste     |

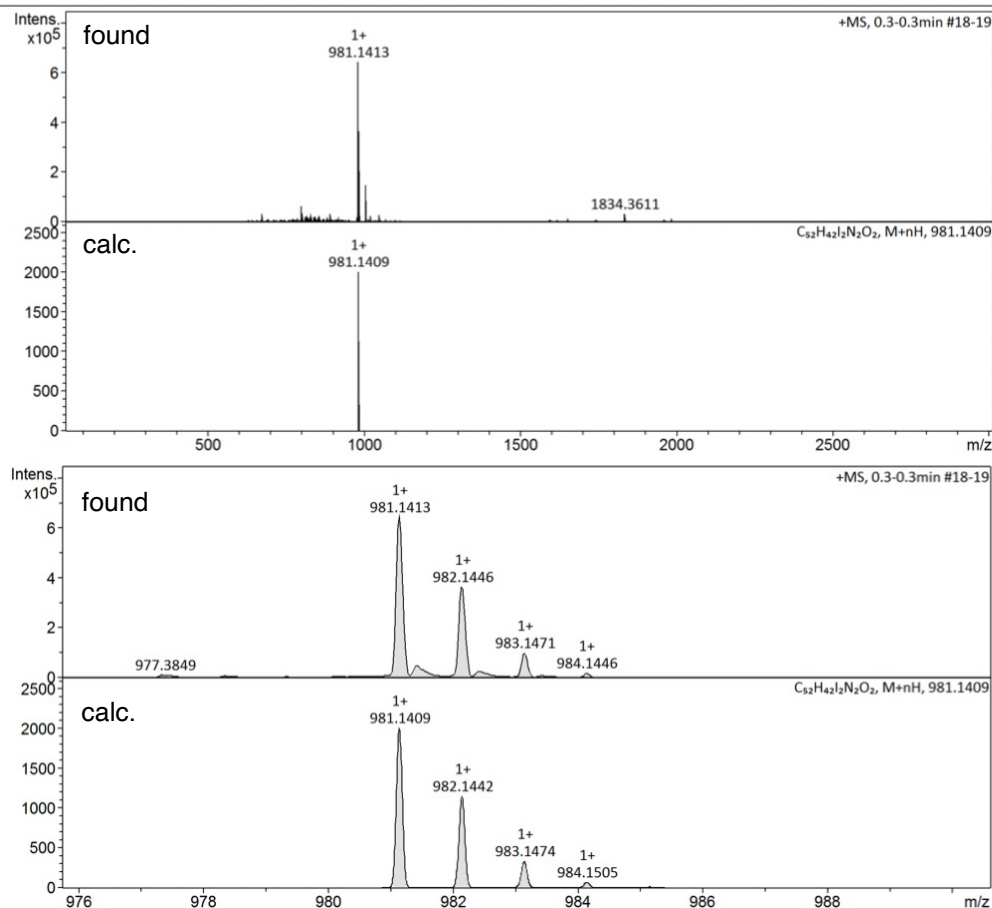

**Figure S7.** HR MS spectrum (ESI, CH<sub>3</sub>OH) of **3<sub>I</sub>**.

### Synthesis of ligand 2

NKS1149, 1150

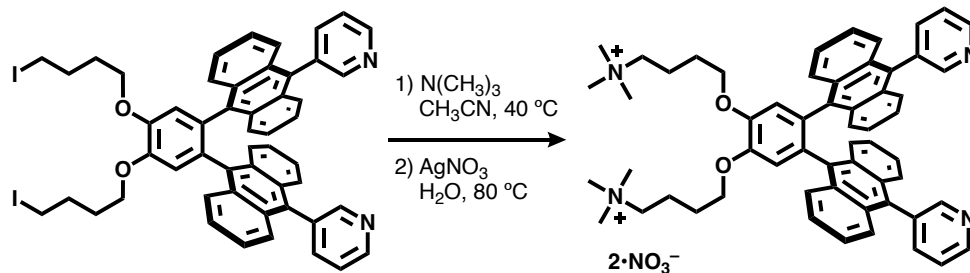

Compound **3<sub>I</sub>** (33.3 mg, 34.0 μmol) and an CH<sub>3</sub>CN solution (2 M) of trimethylamine (10 mL, 20 mmol) were added to a sealed 50 mL flask. The mixture was

stirred at 40 °C overnight. The resultant mixture was concentrated under reduced pressure to afford crude **4** as a yellow solid. The crude **4** (ca. 37 mg, 34 μmol), AgNO<sub>3</sub> (1.73 mg, 102 μmol), and H<sub>2</sub>O (5 mL) were added to a test tube, and then the mixture was stirred at 80 °C overnight. The resultant mixture was concentrated under reduced pressure. After addition of CH<sub>3</sub>OH, the resultant solution was filtered through a membrane filter and then concentrated under reduced pressure. The crude product was washed with hexane to afford ligand **2** (30.1 mg, 31.1 μmol; 91% in 2 steps) as a yellowish-orange solid.

Compound **4**: <sup>1</sup>H NMR (500 MHz, CD<sub>3</sub>OD, r.t.): δ 8.67 (m, 2H), 8.32-8.31 (m, 1H), 7.98 (d, *J* = 8.8 Hz, 1H), 7.94-7.84 (m, 4H), 7.73-7.70 (m, 1H), 7.63-7.51 (m, 4H), 7.40-7.30 (m, 1H), 7.13-6.95 (m, 12H), 4.39-4.33 (m, 4H), 3.63-3.51 (m, 4H), 3.19 (s, 18H), 2.10-2.06 (m, 8H). ESI-TOF MS (CH<sub>3</sub>OH): *m/z* 422.32 [M – 2•I]<sup>2+</sup>, 971.58 [M – I]<sup>+</sup>.

Ligand **2**: <sup>1</sup>H NMR (400 MHz, CD<sub>3</sub>OD, r.t.): δ 8.64 (br, 2H), 8.35 (br, 1H), 7.99-7.89 (m, 5H), 7.72 (d, *J* = 7.6 Hz, 1H), 7.61 (m, 1H), 7.53-7.47 (m, 3H), 7.30-7.24 (m, 1H), 7.10-6.93 (m, 12H), 4.33 (t, *J* = 6.0 Hz, 4H), 3.55 (m, 4H), 3.21 (s, 18H), 2.12 (m, 4H), 2.05 (m, 4H). <sup>13</sup>C NMR (100 MHz, CDCl<sub>3</sub>, r.t.): δ 151.7 (CH), 149.8 (C<sub>q</sub>), 149.2 (CH), 140.7 (CH), 137.8 (C<sub>q</sub>), 136.7 (C<sub>q</sub>), 134.1 (C<sub>q</sub>), 132.5 (C<sub>q</sub>), 131.0 (C<sub>q</sub>), 130.7 (C<sub>q</sub>), 129.0-128.8 (CH), 126.3 (CH), 126.2 (CH), 125.3 (CH), 125.3 (CH), 119.8 (CH), 70.0 (CH<sub>2</sub>), 67.6 (CH<sub>2</sub>), 53.6 (CH<sub>3</sub>), 27.4 (CH<sub>2</sub>), 21.1 (CH<sub>2</sub>). FT-IR (ATR, cm<sup>-1</sup>): 3034, 2926, 1483, 1440, 1319, 1242, 1201, 1157, 1088, 1028, 913, 830, 770, 720, 688, 649, 614. ESI-TOF MS (CH<sub>3</sub>OH): *m/z* 422.26 [M – 2•NO<sub>3</sub><sup>-</sup>]<sup>2+</sup>, 906.49 [M – NO<sub>3</sub><sup>-</sup>]<sup>+</sup>.

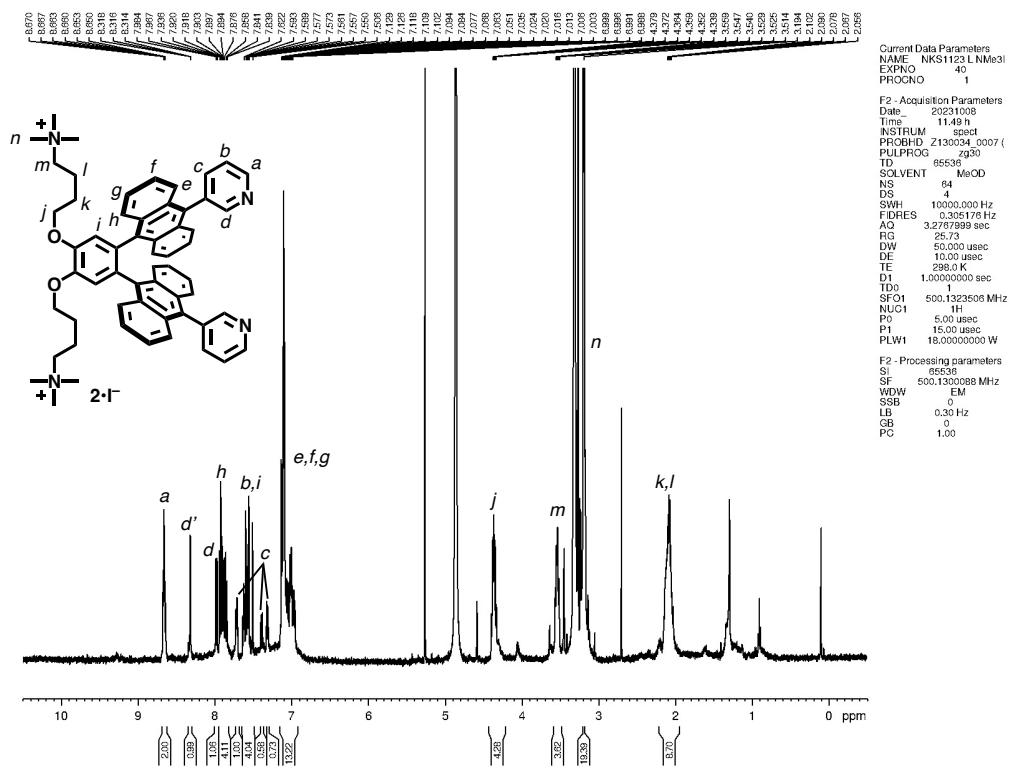

Figure S8.  $^1\text{H}$  NMR spectrum (500 MHz,  $\text{CD}_3\text{OD}$ , r.t.) of **4**.

### Display Report

#### Analysis Info

Analysis Name D:\Data\akita\18kishida\1060 L Me3NBu\Acq000001.d  
 Method esi\_posi\_low.m  
 Sample Name 1  
 Comment

Acquisition Date 2023/09/04 16:12:23

Operator BDAL@DE  
 Instrument micrOTOF 213750.10321

#### Acquisition Parameter

|             |            |                      |          |                  |           |
|-------------|------------|----------------------|----------|------------------|-----------|
| Source Type | ESI        | Ion Polarity         | Positive | Set Nebulizer    | 0.3 Bar   |
| Focus       | Not active | Set Capillary        | 4500 V   | Set Dry Heater   | 180 °C    |
| Scan Begin  | 50 m/z     | Set End Plate Offset | -500 V   | Set Dry Gas      | 4.0 l/min |
| Scan End    | 1000 m/z   |                      |          | Set Divert Valve | Waste     |

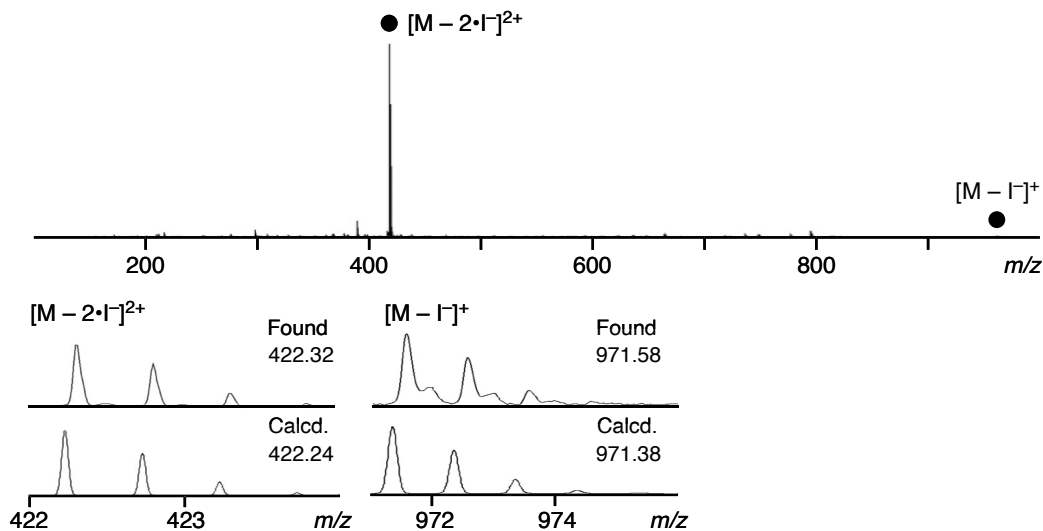

Figure S9. ESI-TOF MS spectrum ( $\text{CH}_3\text{OH}$ ) of **4**.

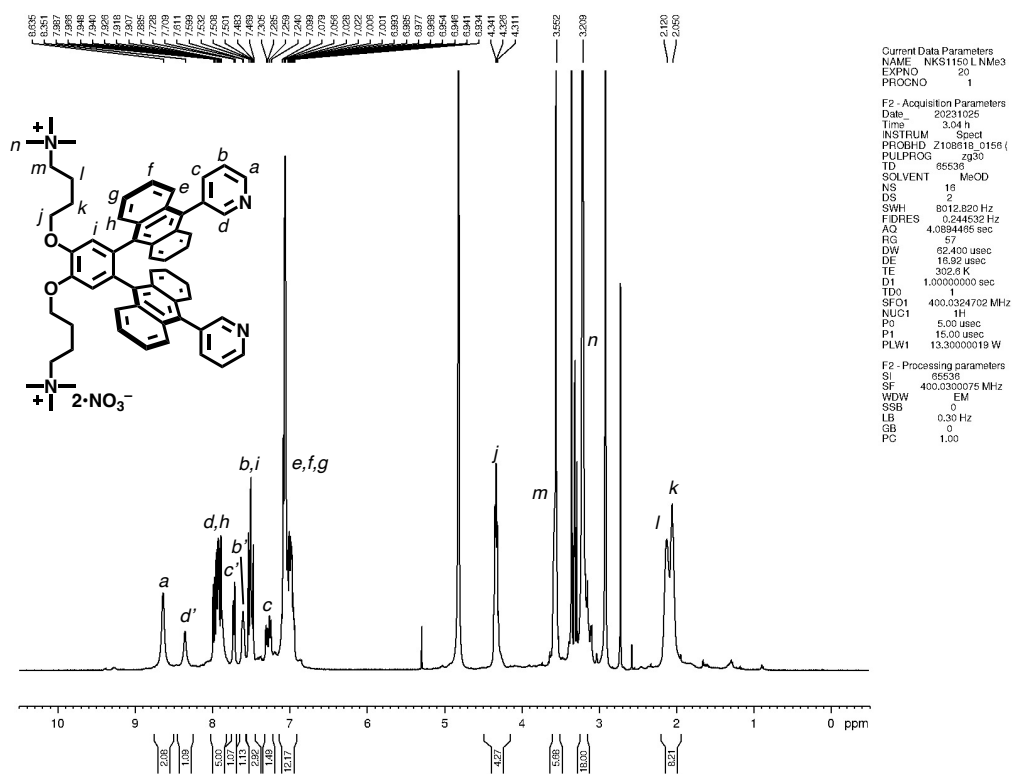

Figure S10. <sup>1</sup>H NMR spectrum (400 MHz, CD<sub>3</sub>OD, r.t.) of **2**.

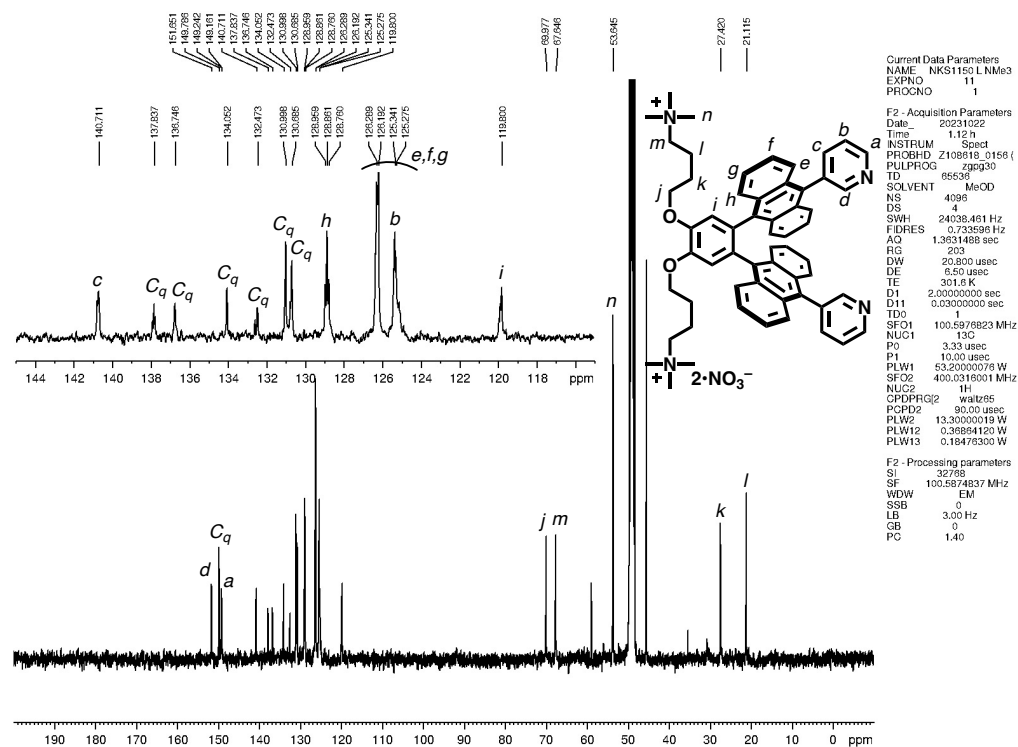

Figure S11. <sup>13</sup>C NMR spectrum (100 MHz, CD<sub>3</sub>OD, r.t.) of **2**.



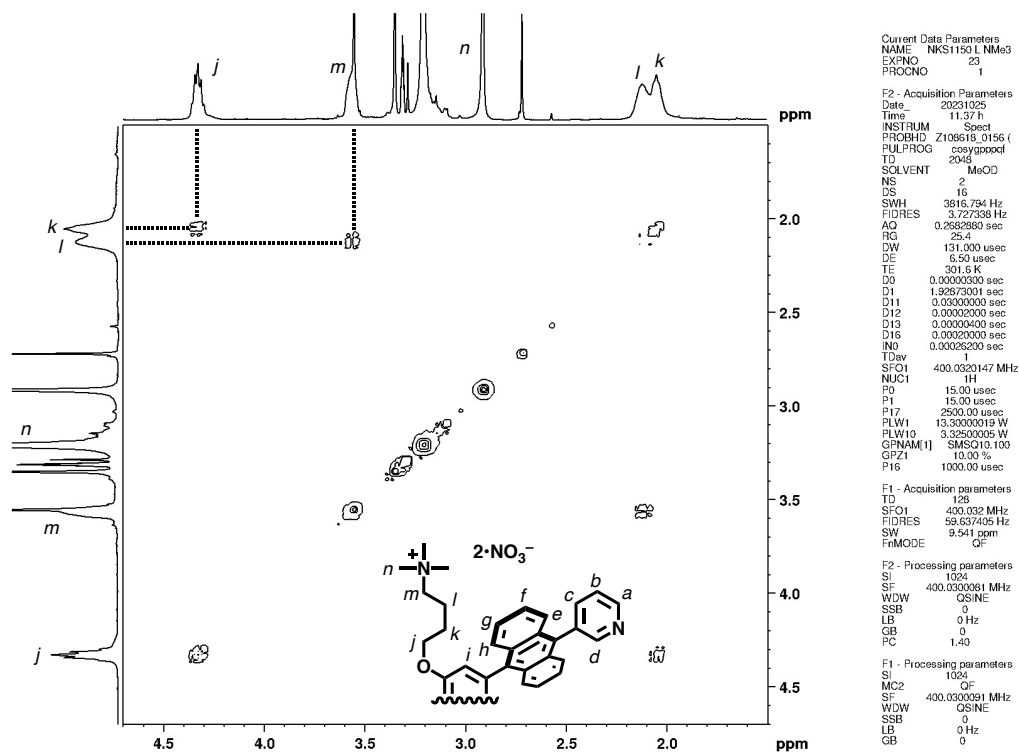

Figure S12.  $^1\text{H}$ - $^1\text{H}$  COSY NMR spectrum (400 MHz,  $\text{CD}_3\text{OD}$ , r.t.) of **2**.

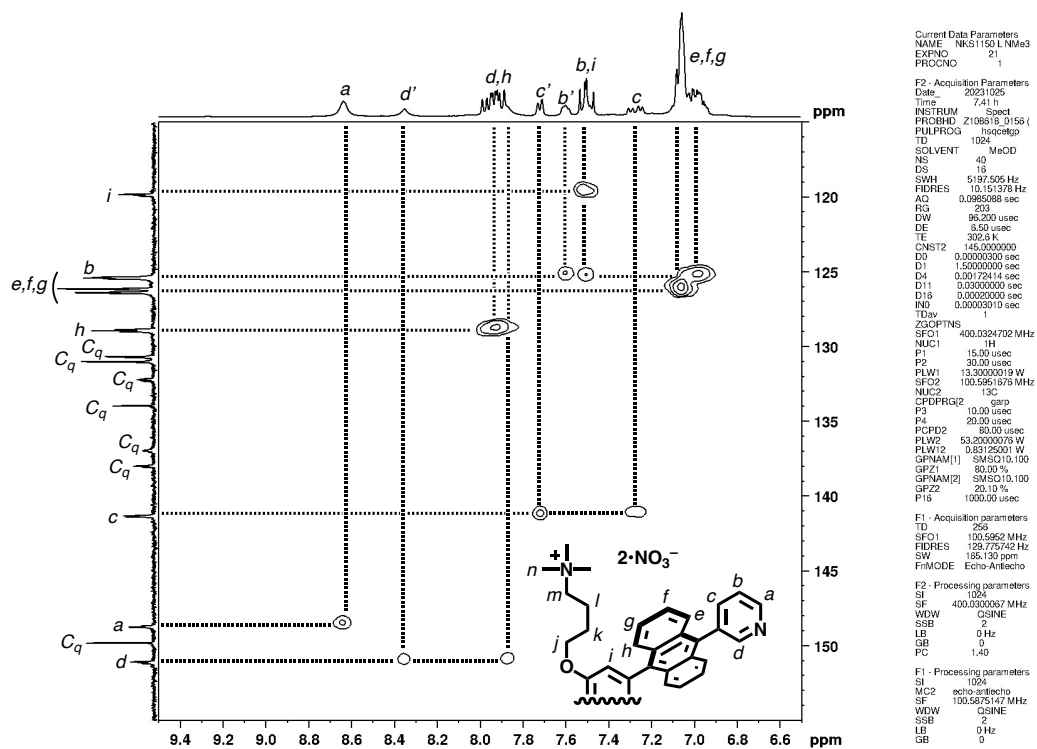

Figure S13a. HSQC NMR spectrum (400 MHz,  $\text{CD}_3\text{OD}$ , r.t.) of **2**.

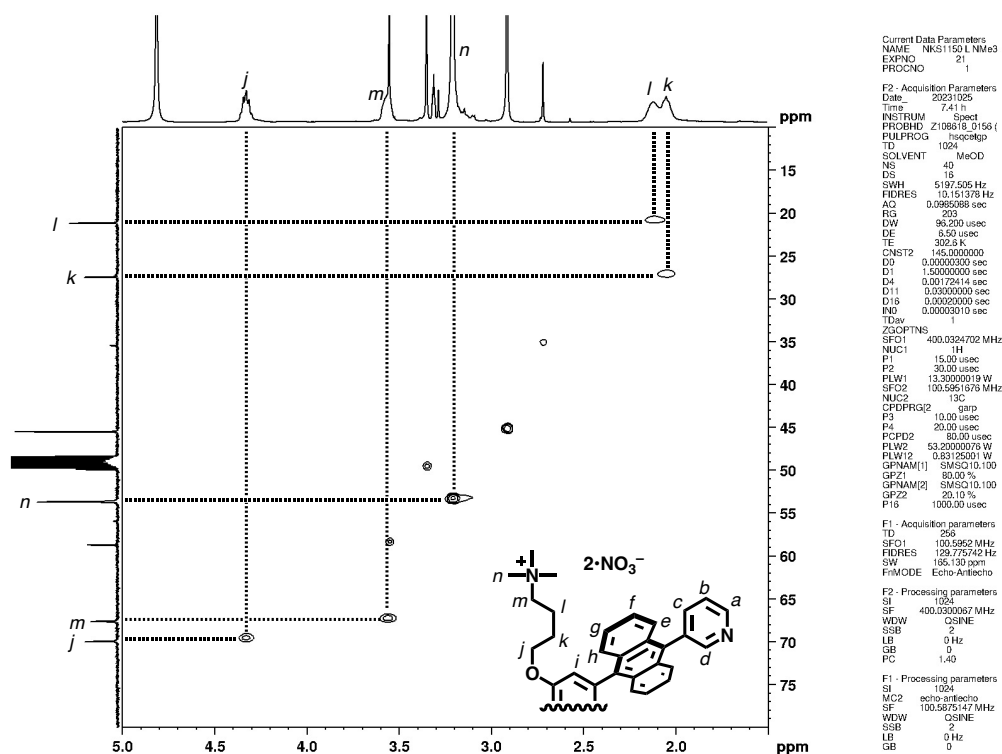

Figure S13b. HSQC NMR spectrum (400 MHz, CD<sub>3</sub>OD, r.t.) of **2**.

### Display Report

#### Analysis Info

Analysis Name D:\Data\akita\18kishida\1128 L NMe3\Acq000001.d  
 Method esi\_posi\_low.m  
 Sample Name 1  
 Comment

Acquisition Date 2023/10/10 13:30:01

Operator BDAL@DE  
 Instrument micrOTOF 213750.10321

#### Acquisition Parameter

|             |            |                      |          |                  |           |
|-------------|------------|----------------------|----------|------------------|-----------|
| Source Type | ESI        | Ion Polarity         | Positive | Set Nebulizer    | 0.3 Bar   |
| Focus       | Not active |                      |          | Set Dry Heater   | 180 °C    |
| Scan Begin  | 50 m/z     | Set Capillary        | 4500 V   | Set Dry Gas      | 4.0 l/min |
| Scan End    | 1500 m/z   | Set End Plate Offset | -500 V   | Set Divert Valve | Waste     |

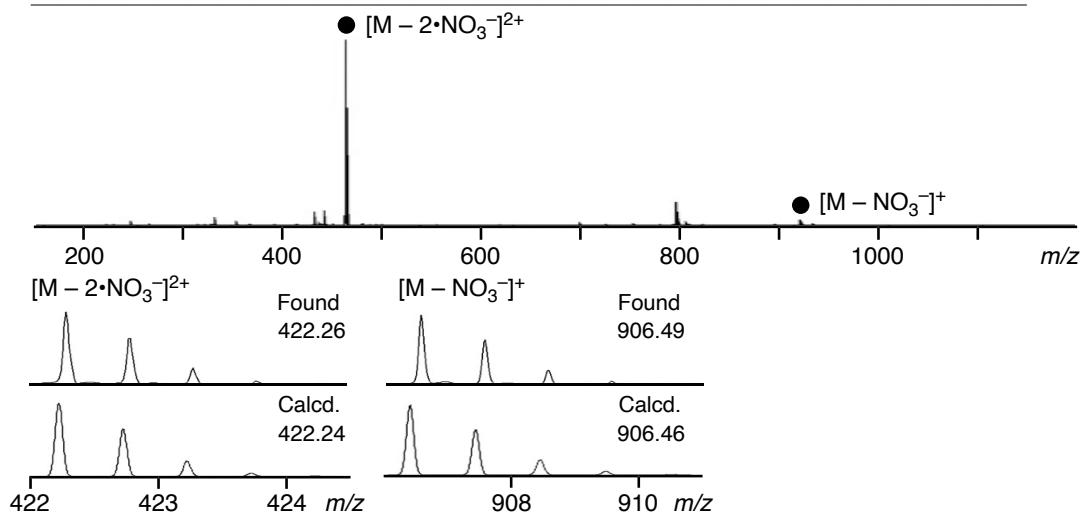

Figure S14. ESI-TOF MS spectrum (CH<sub>3</sub>OH) of **2**.

## Formation of capsule 1

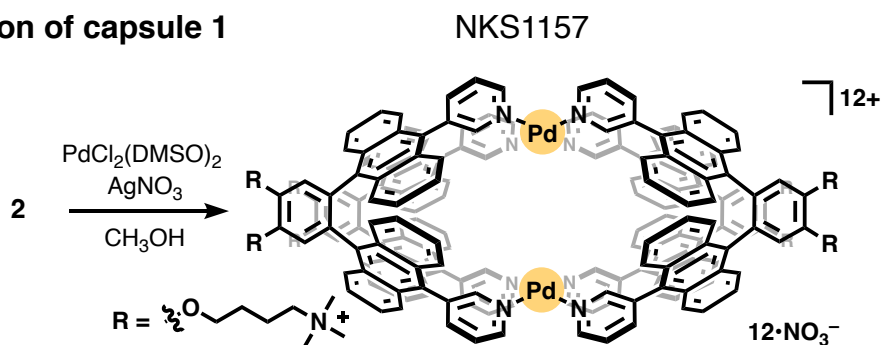

Ligand **2** (30.1 mg, 31.1  $\mu\text{mol}$ ), PdCl<sub>2</sub>(DMSO)<sub>2</sub> (5.45 mg, 16.3  $\mu\text{mol}$ ), AgNO<sub>3</sub> (5.55 mg, 32.7  $\mu\text{mol}$ ), and CH<sub>3</sub>OH (2.0 mL) were added to a glass test tube and then the mixture was stirred at 60 °C for 3 h. After filtration, the crude product was concentrated under reduced pressure. The product was reprecipitated with CH<sub>3</sub>OH/acetone and CH<sub>3</sub>OH/Et<sub>2</sub>O to the resultant solution, capsule **1** was obtained as a yellow solid (25.5 mg, 5.87  $\mu\text{mol}$ , 75%).

<sup>1</sup>H NMR (500 MHz, CD<sub>3</sub>OD, r.t.):  $\delta$  8.84 (d,  $J$  = 5.0 Hz, 8H), 8.76 (br, 8H), 8.32 (d,  $J$  = 8.8 Hz, 8H), 8.19 (d,  $J$  = 8.8 Hz, 8H), 8.03-7.97 (m, 16H), 7.51 (dd,  $J$  = 7.7, 7.7 Hz, 16H), 7.13 (s, 8H), 7.08 (dd,  $J$  = 8.2, 7.7 Hz, 8H), 6.76 (dd,  $J$  = 8.2, 7.7 Hz, 8H), 6.67 (d,  $J$  = 8.2 Hz, 8H), 6.53 (d,  $J$  = 8.2 Hz, 8H), 4.20 (t,  $J$  = 4.8 Hz, 16H), 3.52-3.49 (m, 16H), 3.17 (s, 72H), 2.09-2.03 (m, 16H). <sup>13</sup>C NMR (125 MHz, CDCl<sub>3</sub>, r.t.):  $\delta$  156.2 (CH), 152.1 (CH), 149.8 (C<sub>q</sub>), 146.7 (CH), 139.5 (C<sub>q</sub>), 139.2 (C<sub>q</sub>), 133.9 (C<sub>q</sub>), 131.4 (C<sub>q</sub>), 131.3 (C<sub>q</sub>), 131 (C<sub>q</sub>), 130.5 (C<sub>q</sub>), 130.4 (CH), 129.6 (CH), 128.2 (CH), 127.6 (CH), 126.9 (CH), 126.4 (CH), 126 (CH), 125.5 (CH), 125 (CH), 119.3 (CH), 69.7 (CH<sub>2</sub>), 67.5 (CH<sub>2</sub>), 53.6 (CH<sub>3</sub>), 27.3 (CH<sub>2</sub>), 21 (CH<sub>2</sub>). FT-IR (ATR, cm<sup>-1</sup>): 2927, 1512, 1480, 1440, 1338, 1242, 1195, 1161, 1088, 1031, 973, 829, 772, 708, 691, 675, 615. ESI-TOF MS (CH<sub>3</sub>OH):  $m/z$  557.53 [M - 7•NO<sub>3</sub><sup>-</sup>]<sup>7+</sup>, 660.95 [M - 6•NO<sub>3</sub><sup>-</sup>]<sup>6+</sup>, 805.34 [M - 5•NO<sub>3</sub><sup>-</sup>]<sup>5+</sup>, 1022.47 [M - 4•NO<sub>3</sub><sup>-</sup>]<sup>4+</sup>.

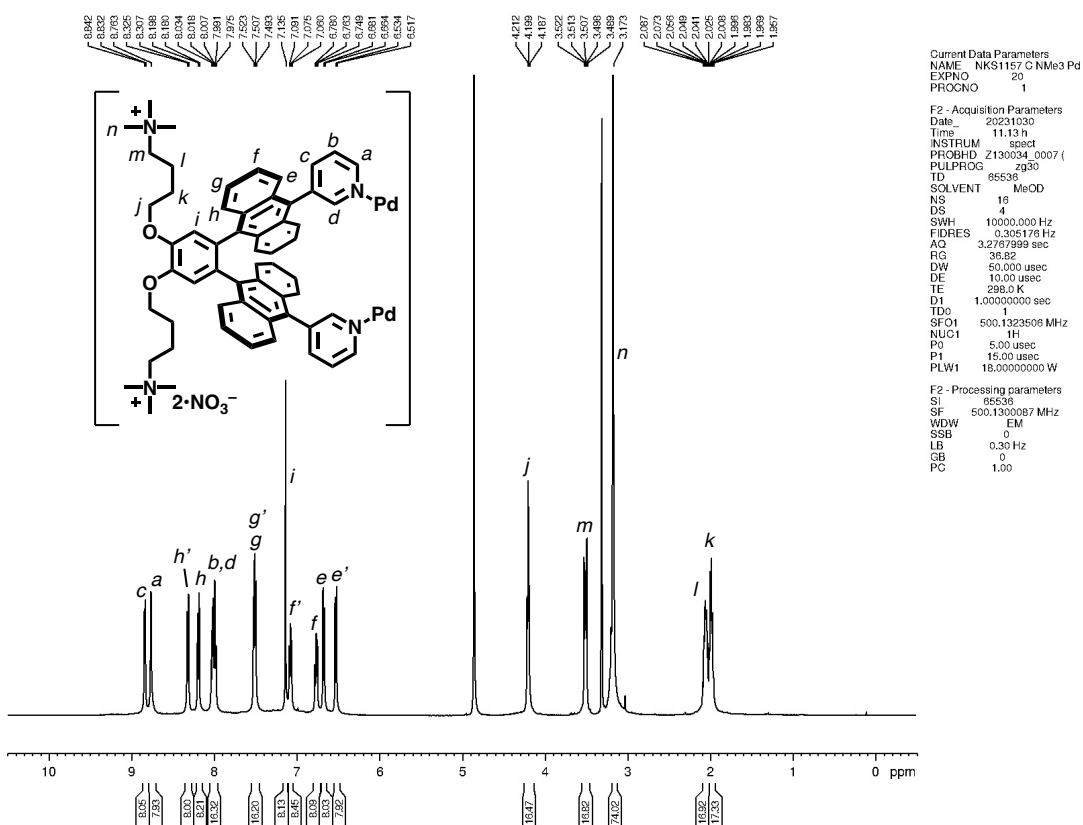

Figure S15. <sup>1</sup>H NMR spectrum (500 MHz, CD<sub>3</sub>OD, r.t.) of **1**.

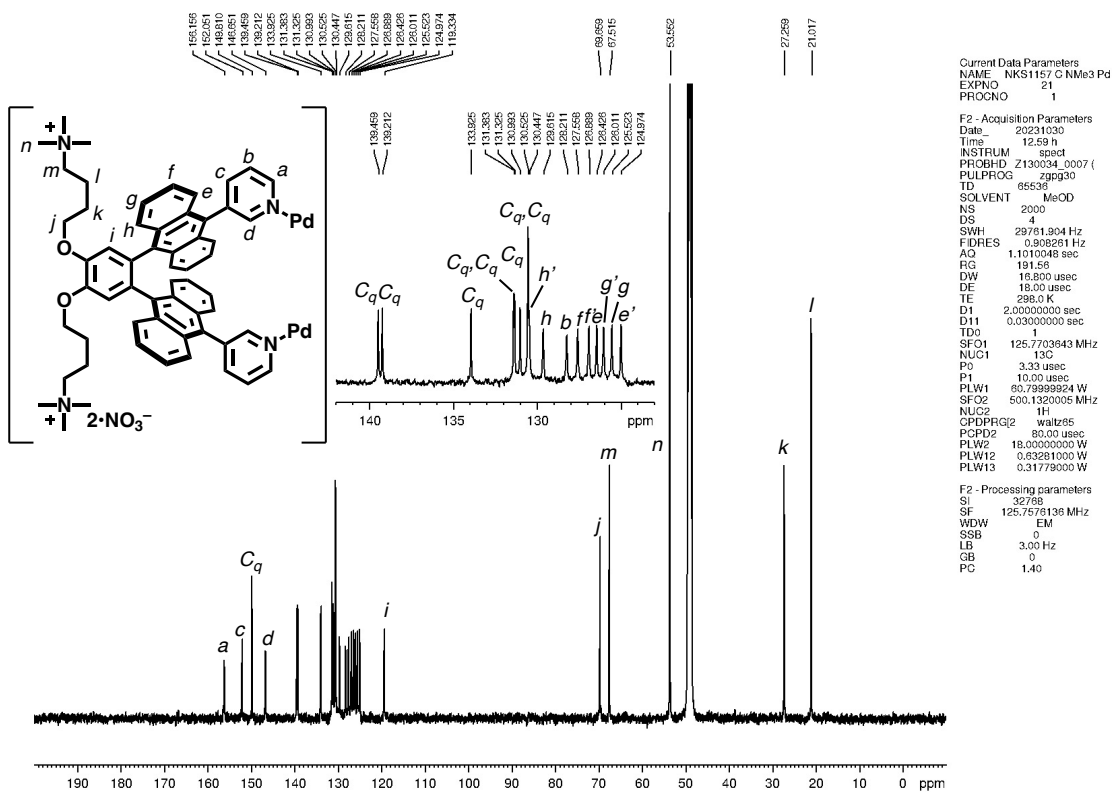

Figure S16. <sup>13</sup>C NMR spectrum (125 MHz, CD<sub>3</sub>OD, r.t.) of **1**.

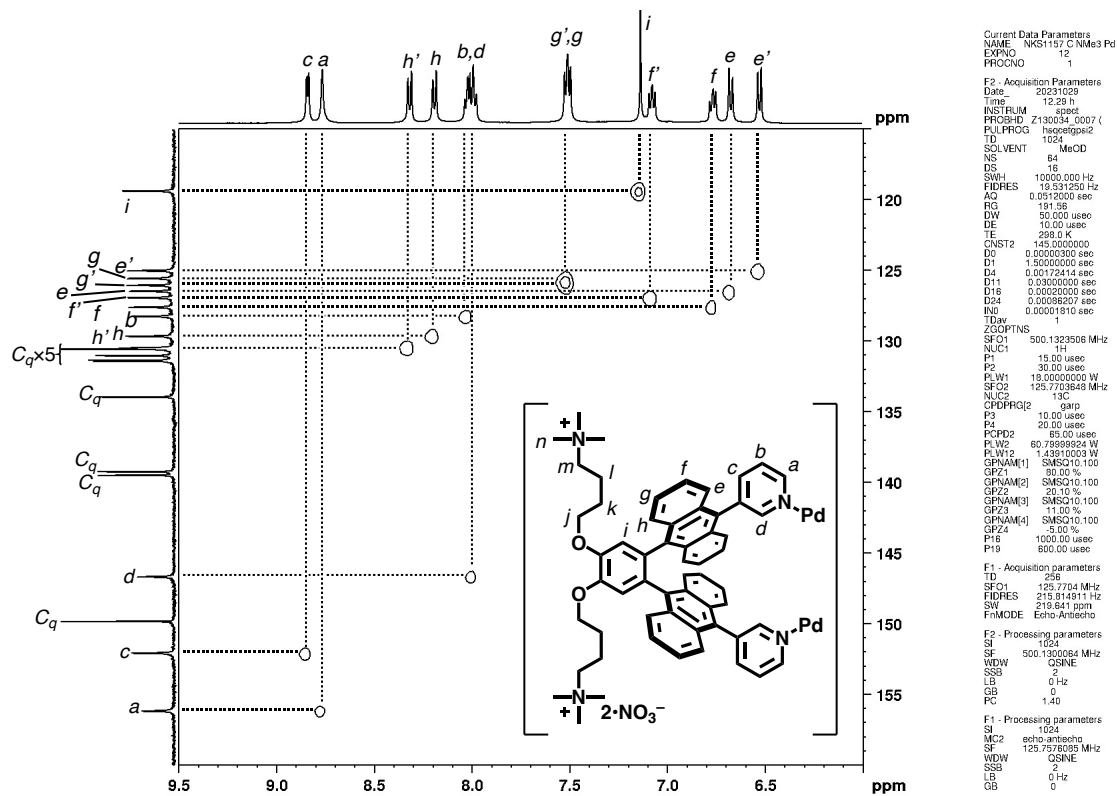

Figure S17. HSQC NMR spectrum (500 MHz, CD<sub>3</sub>OD, r.t.) of 1.

## Display Report

### Analysis Info

Analysis Name D:\Data\akita\18kishida\1157 C NMe3 Pd\MeOH000002.d  
 Method Pd Kusaba01.m  
 Sample Name 1  
 Comment

Acquisition Date 2023/11/01 16:35:27

Operator BDAL@DE  
 Instrument micrOTOF 213750.10321

### Acquisition Parameter

|             |            |                      |          |                  |           |
|-------------|------------|----------------------|----------|------------------|-----------|
| Source Type | ESI        | Ion Polarity         | Positive | Set Nebulizer    | 3.0 Bar   |
| Focus       | Not active |                      |          | Set Dry Heater   | 30 °C     |
| Scan Begin  | 50 m/z     | Set Capillary        | 4500 V   | Set Dry Gas      | 6.0 l/min |
| Scan End    | 3000 m/z   | Set End Plate Offset | -500 V   | Set Divert Valve | Waste     |

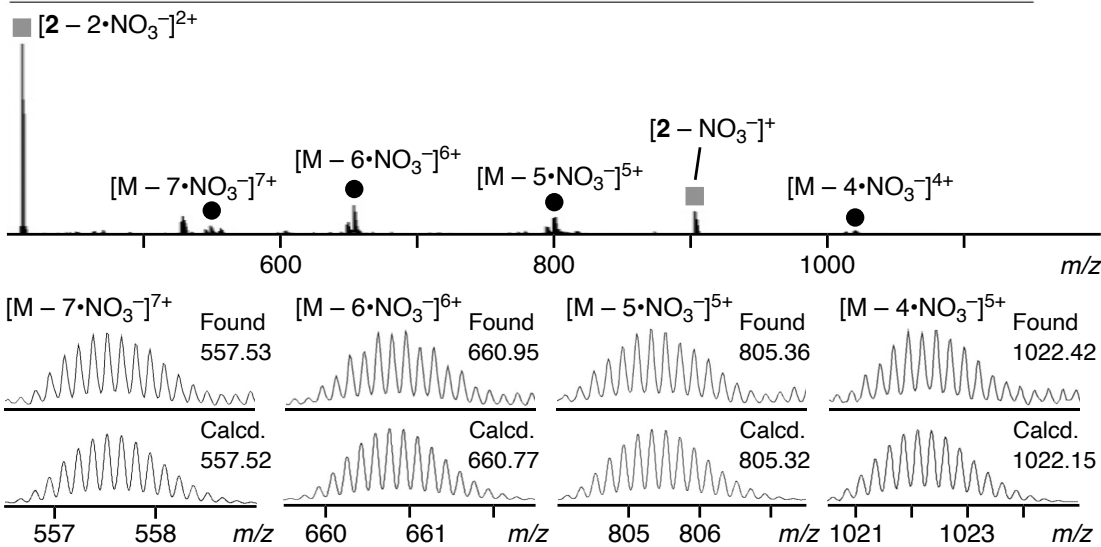

Figure S18. ESI-TOF MS spectrum (CH<sub>3</sub>OH) of 1.

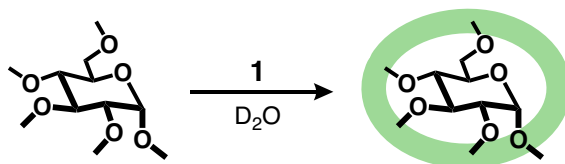

Capsule **1** (0.43 mg, 0.10  $\mu\text{mol}$ ), pentamethylated  $\alpha$ -D-glucose ( $\alpha\text{Glc}^{\text{Me}}$ ; 0.050 mg, 0.20  $\mu\text{mol}$  (via a stock solution)), and  $\text{D}_2\text{O}$  (0.5 mL) were added to a glass test tube (7 mL). The mixture was stirred at 80  $^\circ\text{C}$  for 1 h. The quantitative formation of 1:1 host-guest complex **1** $\cdot\alpha\text{Glc}^{\text{Me}}$  was confirmed by  $^1\text{H}$  NMR analysis. In the similar way, the quantitative formation of **1** $\cdot\alpha\text{Gal}^{\text{Me}}$ , **1** $\cdot\beta\text{Gal}^{\text{Me}}$ , and **1** $\cdot\alpha\text{Man}^{\text{Me}}$  from **1** and the corresponding monosaccharides in  $\text{D}_2\text{O}$  was confirmed by  $^1\text{H}$  NMR analysis, respectively. Capsule **1** (0.43 mg, 0.10  $\mu\text{mol}$ ), a 1:4 mixture of pentamethylated  $\alpha/\beta$ -D-glucose ( $\alpha/\beta\text{Glc}^{\text{Me}}$ ; 0.10 mg, 0.41  $\mu\text{mol}$  based on  $\beta\text{Glc}^{\text{Me}}$ ), and  $\text{D}_2\text{O}$  (0.5 mL) were added to a glass test tube. The mixture was stirred at 80  $^\circ\text{C}$  for 1 h. The formation of 1:1 host-guest complex **1** $\cdot\beta\text{Glc}^{\text{Me}}$  in 95% yield was confirmed by NMR analysis.

**1** $\cdot\alpha\text{Glc}^{\text{Me}}$ :  $^1\text{H}$  NMR (500 MHz,  $\text{D}_2\text{O}$ , r.t.):  $\delta$  8.92 (d,  $J = 5.3$  Hz, 4H), 8.88 (d,  $J = 5.3$  Hz, 4H), 8.43 (m, 8H), 8.34 (m, 8H), 8.25-8.17 (m, 16H), 8.05 (s, 4H), 8.03 (s, 4H), 7.65 (m, 16H), 7.22 (s, 4H), 7.22 (dd,  $J = 7.5, 7.5$  Hz, 8H), 7.18 (s, 4H), 6.98 (dd,  $J = 7.7, 7.7$  Hz, 4H), 6.69 (d,  $J = 9.2$  Hz, 4H), 6.66 (dd,  $J = 7.2, 7.2$  Hz, 4H), 6.61 (d,  $J = 8.6$  Hz, 4H), 6.54 (d,  $J = 8.5$  Hz, 4H), 6.53 (d,  $J = 8.5$  Hz, 4H), 4.26 (m, 16H), 3.42 (m, 16H), 3.12 (s, 32H), 3.12 (s, 32H), 2.81 (m, 1H), 2.55 (d,  $J = 3.2$  Hz, 1H), 2.38-2.34 (m, 2H), 2.01-1.95 (m, 32H), 1.86 (m, 1H), 1.31 (dd,  $J = 9.0, 9.0$  Hz, 1H), 0.68 (d,  $J = 10.5$  Hz, 1H), 0.00 (s, 3H), -0.31 (s, 3H), -0.55 (s, 3H), -0.83 (s, 3H), -0.87 (s, 3H).

**1** $\cdot\beta\text{Glc}^{\text{Me}}$ :  $^1\text{H}$  NMR (500 MHz,  $\text{D}_2\text{O}$ , r.t.):  $\delta$  8.91 (m, 4H), 8.87 (d,  $J = 5.7$  Hz, 4H), 8.84 (d,  $J = 5.8$  Hz, 4H), 8.42 (m, 8H), 8.34-8.26 (m, 16H), 8.19 (m, 8H), 8.10 (s, 2H), 8.07 (s, 4H), 7.92 (s, 2H), 7.64 (m, 16H), 7.23-7.20 (m, 16H), 6.98 (dd,  $J = 8.2, 8.2$  Hz, 1.8H), 6.94 (dd,  $J = 7.2, 9.0$  Hz, 2.2H), 6.82 (dd,  $J = 7.5, 7.5$  Hz, 1.8H), 6.77 (dd,  $J = 7.6, 7.6$  Hz, 2.2H), 6.71 (d,  $J = 8.8$  Hz, 1.8H), 6.66 (d,  $J = 8.9$  Hz, 2.2H), 6.61-6.54 (m, 8H), 4.26 (m, 16H), 3.41 (m, 16H), 3.12 (s, 72H), 2.75 (m, 1H), 2.55 (d,  $J = 4.1$  Hz, 1H), 2.37 (m, 1H), 2.00-1.96 (m, 32H), 1.68 (m, 0.5H), 1.44 (m, 0.5H), 1.34 (m, 0.5H), 1.15 (m, 0.5H), 1.06 (m, 0.5H), 0.76 (m, 0.5H), 0.50 (m, 0.5H), 0.45 (m, 0.5H), -0.11 (s, 1.6H), -0.14 (s, 1.4H), -0.29 (s, 1.4H), -0.44 (s, 1.6H), -0.46 (s, 1.6H), -0.67 (s, 3H), -0.70 (s, 1.4H), -0.83 (s, 1.6H), -0.86 (s, 1.4H).

**1• $\alpha$ Gal<sup>Me</sup>**: <sup>1</sup>H NMR (500 MHz, D<sub>2</sub>O, r.t.):  $\delta$  8.97-8.94 (m, 4H), 8.91 (d,  $J = 5.5$  Hz, 3.1H), 8.87 (d,  $J = 5.8$  Hz, 0.9H), 8.48-8.41 (m, 8H), 8.33-8.67 (m, 27.1H), 8.06 (s, 3.1H), 8.03 (s, 0.9H), 7.97 (s, 0.9H), 7.72-7.63 (m, 12.9), 7.59 (dd,  $J = 7.7, 7.7$  Hz, 3.1H), 7.25 (m, 8H), 7.21 (s, 0.9H), 7.20 (s, 3.1H), 7.18 (s, 0.9H), 7.15 (s, 3.1H), 6.99 (dd,  $J = 6.8, 8.0$  Hz, 0.9H), 6.89 (dd,  $J = 7.1, 8.3$  Hz, 3.1H), 6.75-6.70 (m, 1.8H), 6.65-6.52 (m, 15.1H), 6.49 (d,  $J = 9.0$  Hz, 31.H), 4.24 (m, 16H), 3.41 (m, 16H), 3.11 (s, 32H), 3.11 (s, 32H), 2.82 (d,  $J = 9.3$  Hz, 1H), 2.66 (d,  $J = 3.5$  Hz, 1H), 2.00-1.94 (m, 32H), 1.34 (dd,  $J = 4.1, 10.1$  Hz, 1H), 1.22 (d,  $J = 3.4$  Hz, 1H), 0.12 (s, 2.3H), 0.09 (s, 0.7H), -0.26 (s, 0.7H), -0.29 (d,  $J = 12.0$  Hz, 1H), -0.38 (s, 0.7H), -0.48 (s, 0.7H), -0.82 (s, 2.3H), -0.87 (s, 2.3H), -0.99 (s, 2.3H), -1.08 (s, 2.3H), -1.19 (s, 0.7H).

**1• $\beta$ Gal<sup>Me</sup>**: <sup>1</sup>H NMR (500 MHz, D<sub>2</sub>O, r.t.):  $\delta$  8.91-8.88 (m, 8H), 8.46-8.40 (m, 8H), 8.35-8.27 (m, 16H), 8.19 (m, 8H), 8.09 (s, 2.5H), 8.03 (s, 1.5H), 7.99 (s, 1.5H), 7.96 (s, 2.5H), 7.66 (m, 16H), 7.26-7.19 (m, 16H), 6.91 (dd,  $J = 6.9, 8.3$  Hz, 3H), 6.86-6.81 (m, 5H), 6.65-6.55 (m, 16H), 4.25 (m, 16H), 3.43 (m, 16H), 3.12 (s, 72H), 2.16-2.13 (m, 3H), 2.01-1.96 (m, 32H), 1.72 (m, 1H), 1.28 (dd,  $J = 4.7, 7.0$  Hz, 1H), 1.20 (m, 0.3H), 1.16 (m, 0.7H), 0.31 (d,  $J = 7.7$  Hz, 1.1H), -0.02 (s, 1.9H), -0.12 (s, 1.1H), -0.17 (s, 1.9H), -0.28 (s, 1.9H), -0.35 (s, 1.1H), -0.49 (s, 1.1H), -0.55 (s, 1.9H), -0.80 (s, 1.1H), -0.92 (s, 1.1H), -1.06 (s, 1.9H).

**1• $\alpha$ Man<sup>Me</sup>**: <sup>1</sup>H NMR (500 MHz, D<sub>2</sub>O, r.t.):  $\delta$  8.90 (m, 8H), 8.45 (d,  $J = 8.7$  Hz, 4H), 8.41 (d,  $J = 8.9$  Hz, 4H), 8.35-8.27 (m, 16H), 8.20 (m, 8H), 8.06 (s, 0.5H), 8.03 (s, 3.5H), 7.99 (s, 4H), 7.64-7.58 (m, 16H), 7.23-7.18 (m, 16H), 6.93 (dd,  $J = 7.1, 9.0$  Hz, 0.5H), 6.84 (dd,  $J = 7.3, 7.9$  Hz, 3.5H), 6.72 (dd,  $J = 6.7, 8.5$  Hz, 3.5H), 6.69-6.50 (m, 16.5H), 4.25 (t,  $J = 6.0$  Hz, 16H), 3.42 (m, 16H), 3.11 (s, 72H), 2.38 (m, 1H), 2.01-1.94 (m, 32H), 1.86 (m, 1H), 1.81 (m, 1H), 1.63-1.17 (m, 2H), 0.70 (d,  $J = 10.8$  Hz, 1H), 0.62 (d,  $J = 3.5$  Hz, 1H), 0.19 (s, 2.6H), -0.14 (s, 0.4H), -0.29 (s, 2.6H), -0.35 (s, 0.4H), -0.40 (s, 2.6H), -0.46 (s, 2.6H), -0.50 (s, 2.6H), -0.62 (s, 0.4H), -0.73 (s, 0.4H), -0.84 (s, 0.4H).

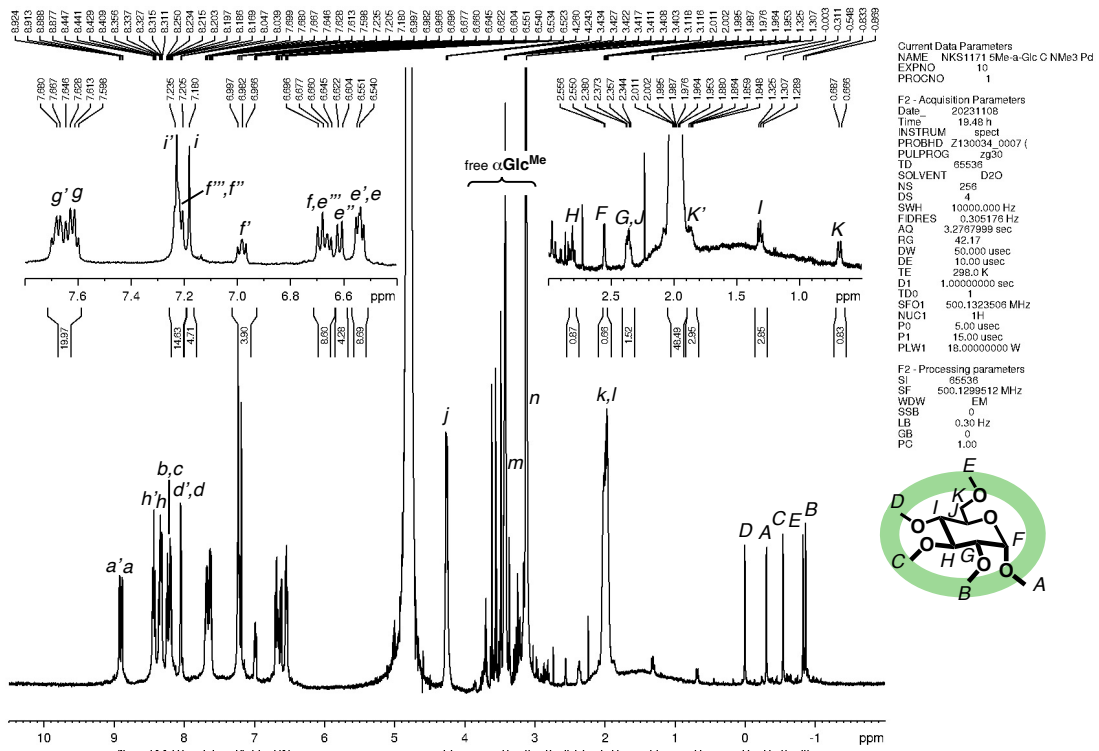

Figure S19a. <sup>1</sup>H NMR spectrum (500 MHz, D<sub>2</sub>O, r.t.) of 1•αGlc<sup>Me</sup>.

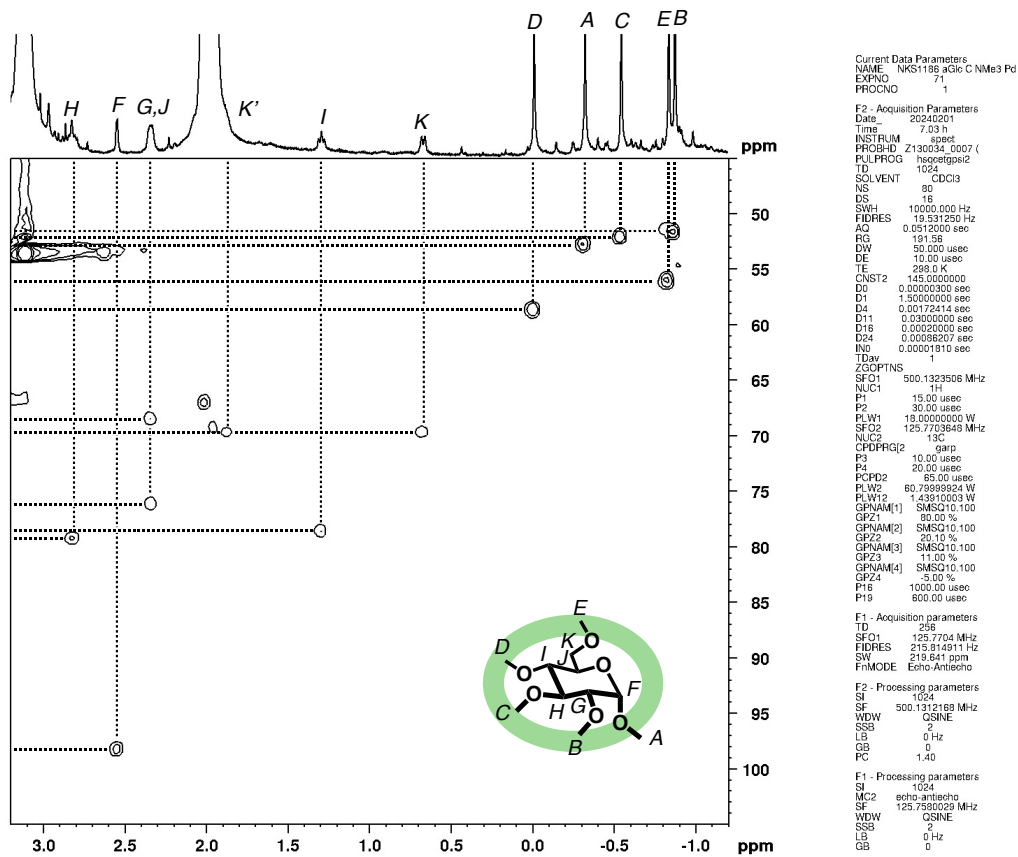

Figure S19b. HSQC NMR spectrum (500 MHz, D<sub>2</sub>O, r.t.) of 1•αGlc<sup>Me</sup>.



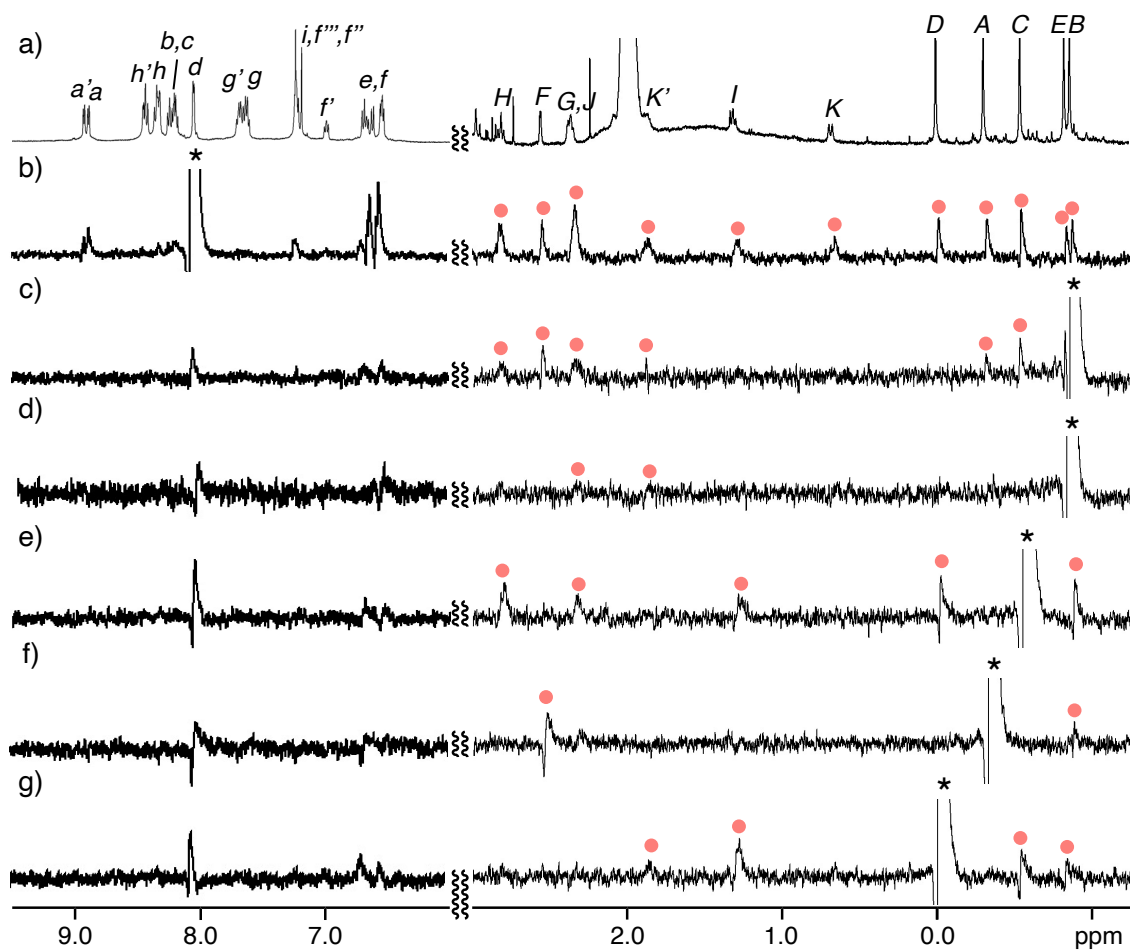

**Figure S19c.** 1D-NOESY spectra (500 MHz, D<sub>2</sub>O, r.t.) of **1•αGlc<sup>Me</sup>** a) without irradiation, and with irradiation at b) 8.04, c) -0.88, d) -0.84, e) -0.55, f) -0.33, and g) -0.01 ppm.

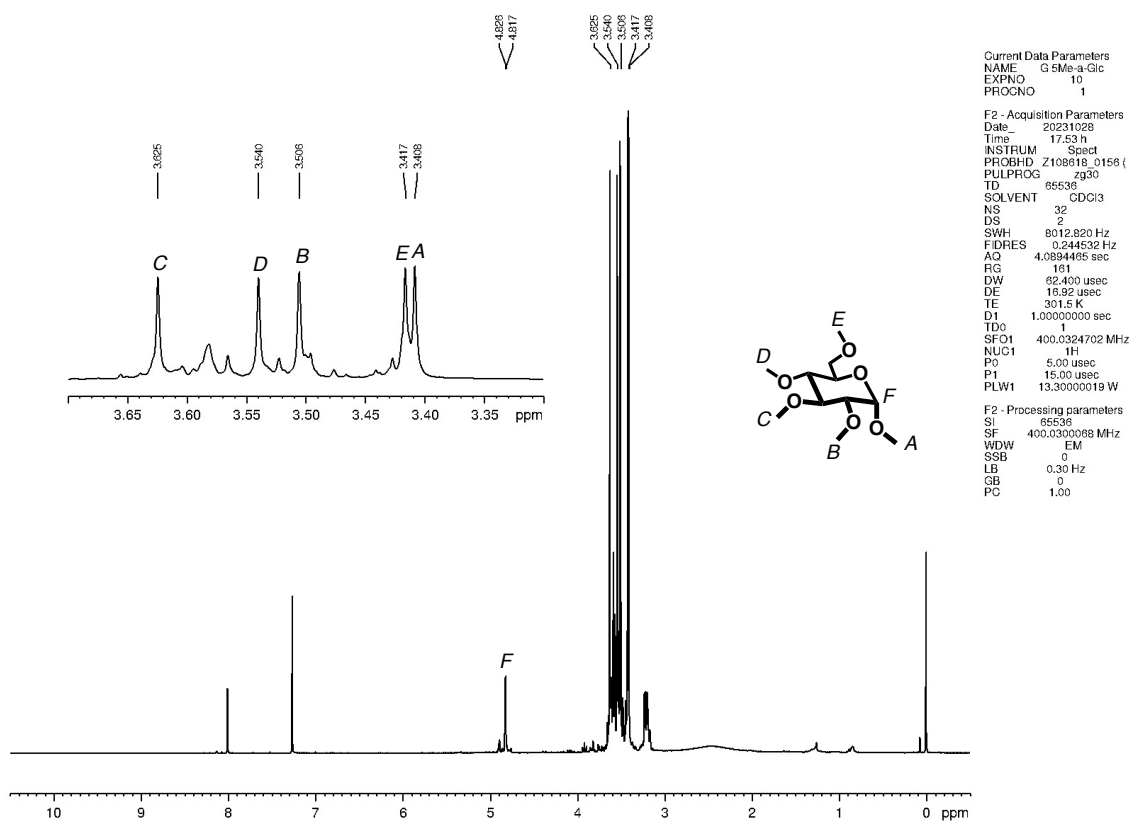

Figure S19d. <sup>1</sup>H NMR spectrum (400 MHz, CDCl<sub>3</sub>, r.t.) of αGlcMe.

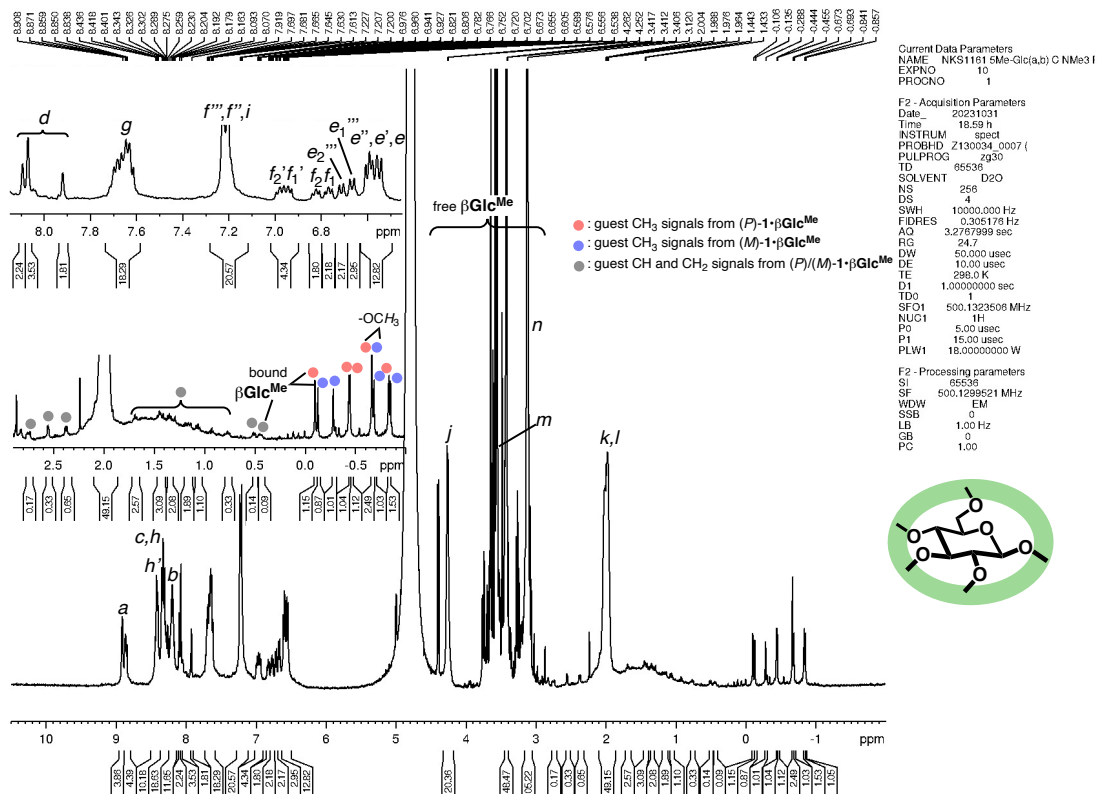

Figure S20. <sup>1</sup>H NMR spectrum (500 MHz, D<sub>2</sub>O, r.t.) of 1-βGlcMe.

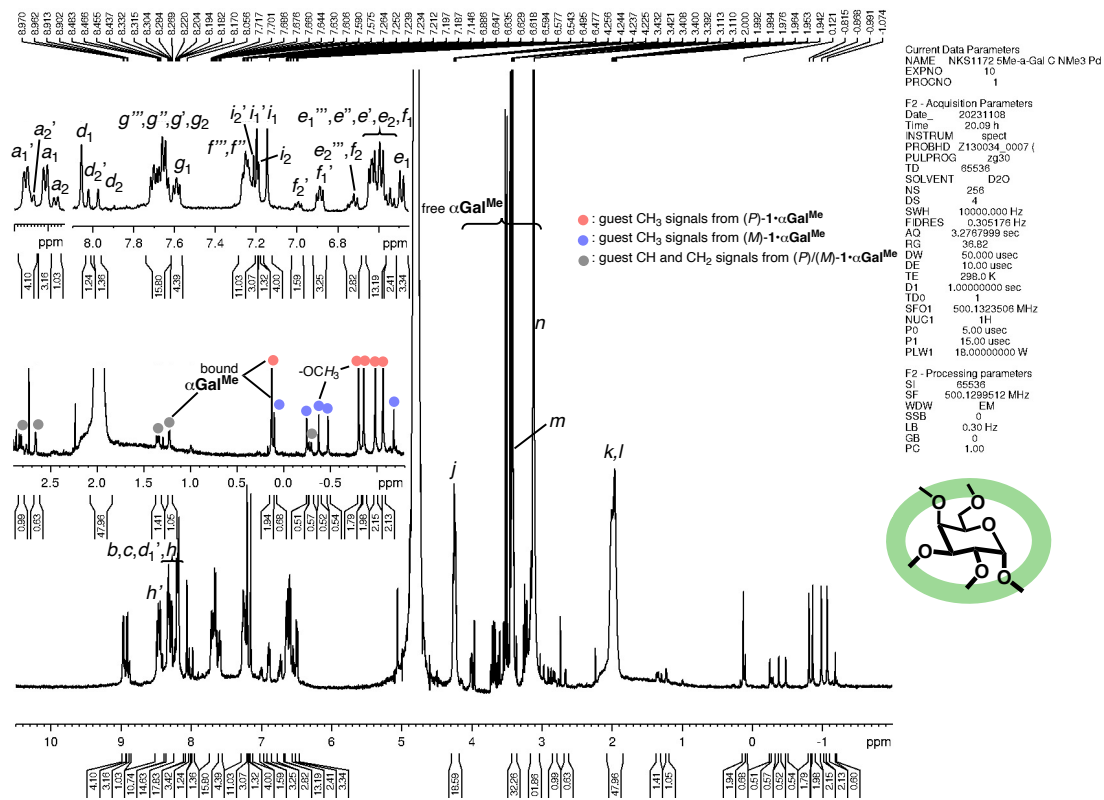

Figure S21.  $^1\text{H}$  NMR spectrum (500 MHz,  $\text{D}_2\text{O}$ , r.t.) of  $1\text{-}\alpha\text{GalMe}$ .

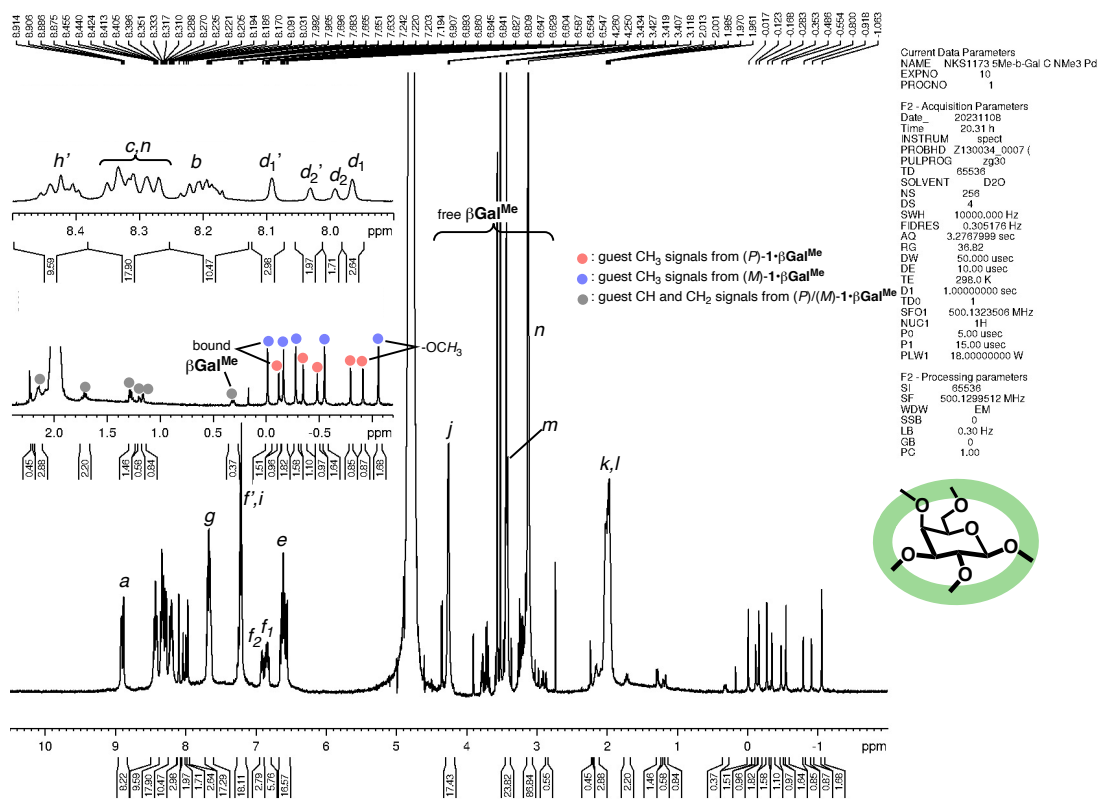

Figure S22.  $^1\text{H}$  NMR spectrum (500 MHz,  $\text{D}_2\text{O}$ , r.t.) of  $1\text{-}\beta\text{GalMe}$ .

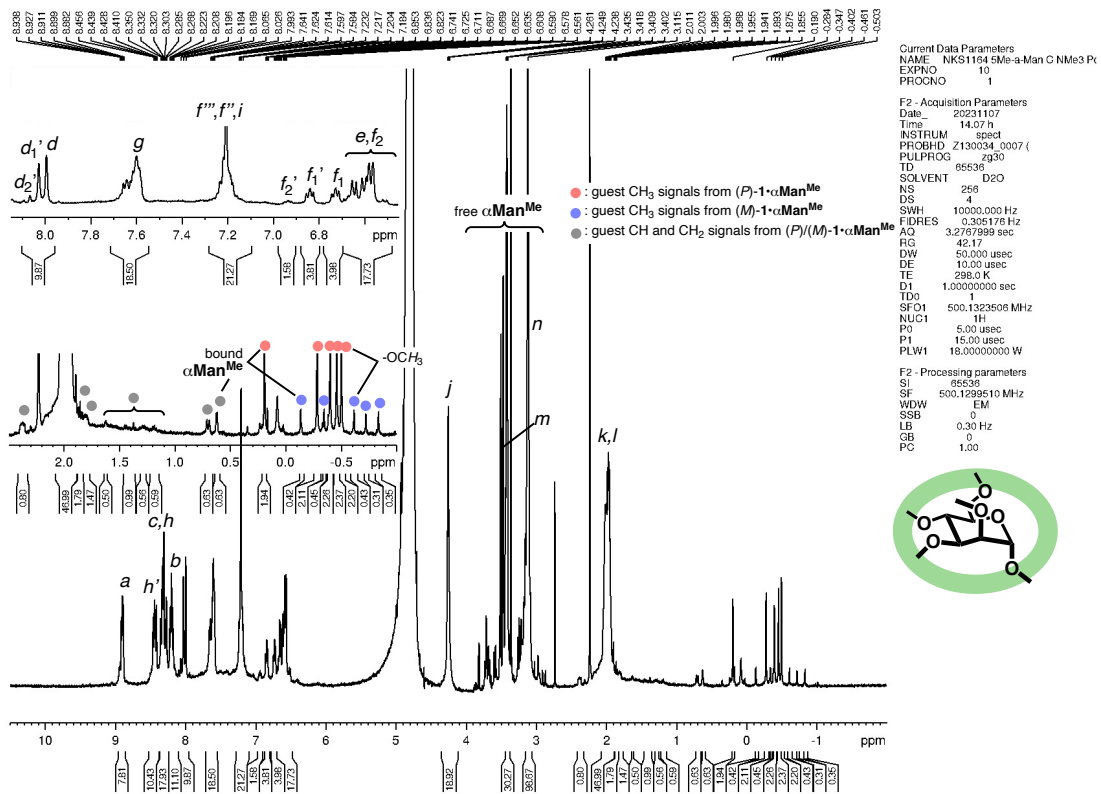

Figure S23. <sup>1</sup>H NMR spectrum (500 MHz, D<sub>2</sub>O, r.t.) of **1-α-ManMe**.

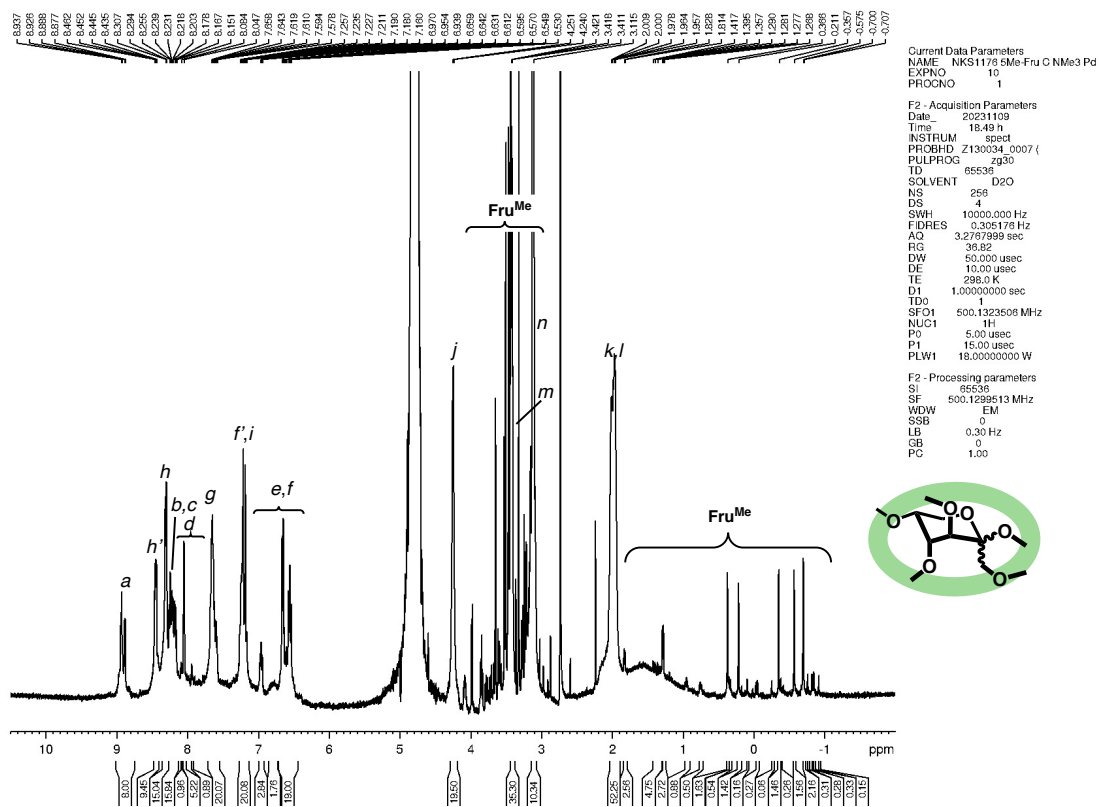

Figure S24. <sup>1</sup>H NMR spectrum (500 MHz, D<sub>2</sub>O, r.t.) of **1-FruMe**.

## Formation of $1'' \cdot \alpha\text{Glc}^{\text{Me}}$

NKS1182

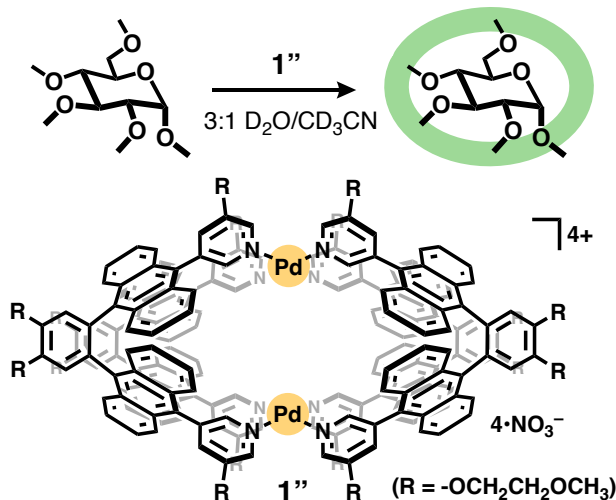

For the MS analysis, capsule  $1''$  (0.43 mg, 0.10  $\mu\text{mol}$ ),  $\alpha\text{Glc}^{\text{Me}}$  (1.3 mg, 5.0  $\mu\text{mol}$ ), and 3:1  $\text{D}_2\text{O}/\text{CD}_3\text{CN}$  (0.5 mL) were added to a glass test tube. The mixture was stirred at 80 °C for 1 h. The formation of 1:1 host-guest complex  $1'' \cdot \alpha\text{Glc}^{\text{Me}}$  in 65% yield was confirmed by NMR analysis. The product solution was concentrated under reduced pressure and washed with water to remove excess  $\alpha\text{Glc}^{\text{Me}}$ . The structure of the 1:1 host-guest complex was confirmed by MS analysis in methanol.

ESI-TOF MS ( $\text{CH}_3\text{OH}$ ):  $m/z$  996.61 [ $1'' \cdot \alpha\text{Glc}^{\text{Me}} - 4 \cdot \text{NO}_3^-$ ]<sup>4+</sup>, 1349.15 [ $1'' \cdot \alpha\text{Glc}^{\text{Me}} - 3 \cdot \text{NO}_3^-$ ]<sup>3+</sup>, 2055.22 [ $1'' \cdot \alpha\text{Glc}^{\text{Me}} - 2 \cdot \text{NO}_3^-$ ]<sup>2+</sup>.

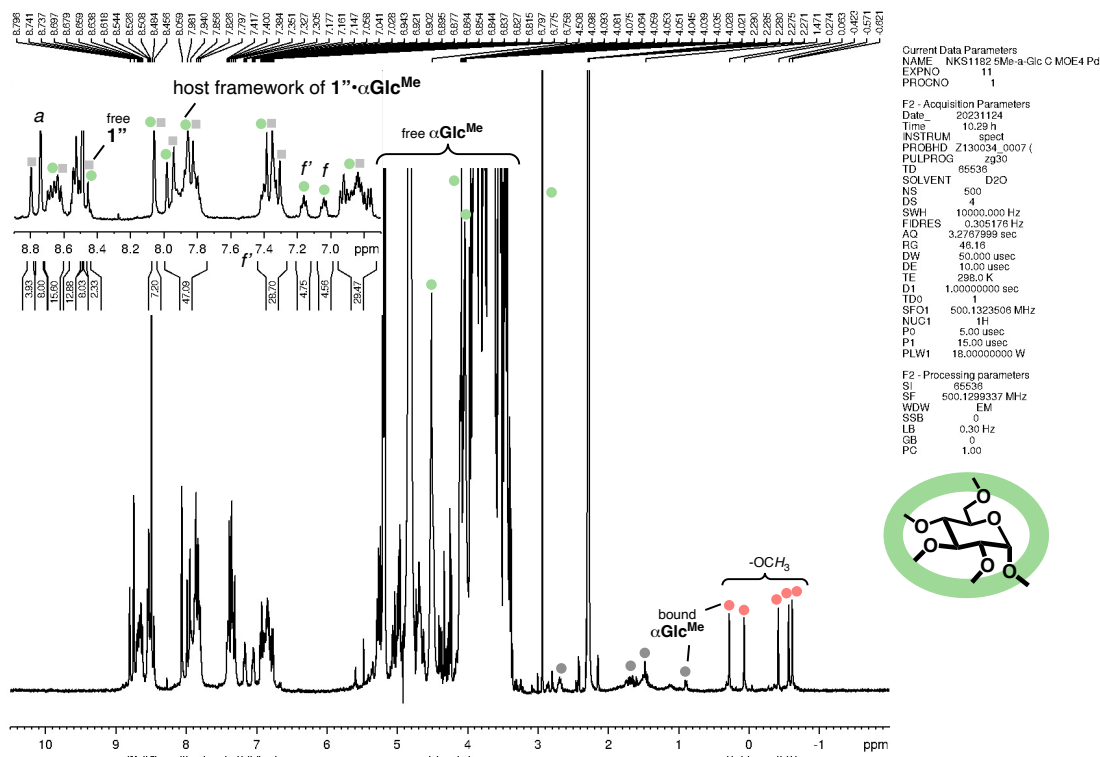

Figure S25.  $^1\text{H}$  NMR spectrum (500 MHz, 3:1  $\text{D}_2\text{O}/\text{CD}_3\text{CN}$ , r.t.) of  $1''\text{-}\alpha\text{GlcMe}$ .

### Display Report

|                                                                            |                                      |
|----------------------------------------------------------------------------|--------------------------------------|
| <b>Analysis Info</b>                                                       | Acquisition Date 2023/11/24 14:34:52 |
| Analysis Name D:\Data\akita\18kishida\1182 5Me-a-Glc C MOE4 Pd\Acq000001.d |                                      |
| Method Kishida_capsule.m                                                   | Operator BDAL@DE                     |
| Sample Name jenny059-APCI-                                                 | Instrument micrOTOF 213750.10321     |
| Comment                                                                    |                                      |

|                              |                             |                        |  |  |
|------------------------------|-----------------------------|------------------------|--|--|
| <b>Acquisition Parameter</b> |                             |                        |  |  |
| Source Type ESI              | Ion Polarity Positive       | Set Nebulizer 3.0 Bar  |  |  |
| Focus Not active             |                             | Set Dry Heater 30 °C   |  |  |
| Scan Begin 50 m/z            | Set Capillary 2700 V        | Set Dry Gas 3.0 l/min  |  |  |
| Scan End 3000 m/z            | Set End Plate Offset -500 V | Set Divert Valve Waste |  |  |

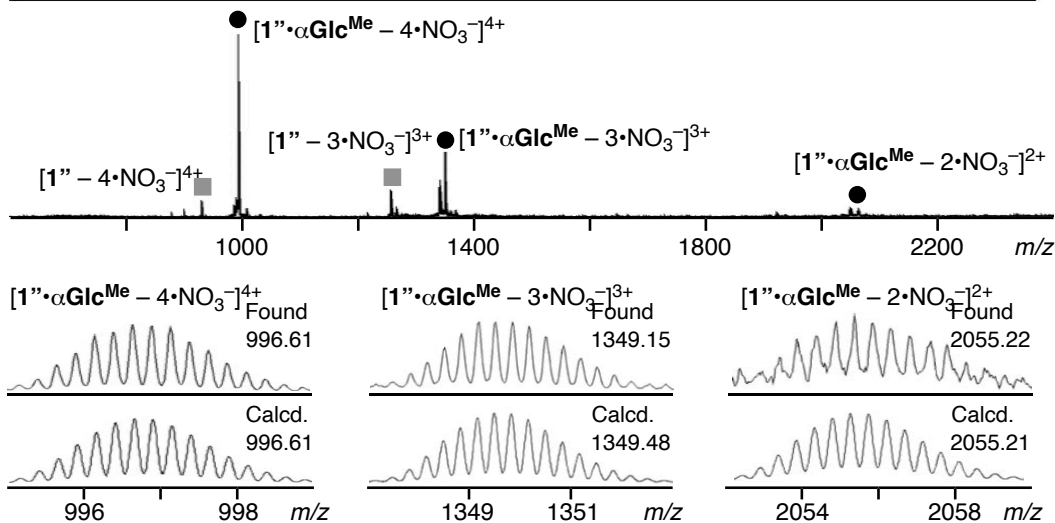

Figure S26. ESI-TOF MS spectrum ( $\text{CH}_3\text{OH}$ ) of  $1''\text{-}\alpha\text{GlcMe}$ .

**Binding constant of  $1 \cdot \beta\text{Glc}^{\text{Me}}$** 

NKS1194

Capsule **1** (0.34 mg, 0.078  $\mu\text{mol}$ ), 1:4  $\alpha/\beta\text{Glc}^{\text{Me}}$  mixture (0.10 mg, 0.40  $\mu\text{mol}$  based on  $\beta\text{Glc}^{\text{Me}}$ ), and  $\text{D}_2\text{O}$  (0.5 mL) were added to a glass test tube. The mixture was stirred at 80  $^\circ\text{C}$  for 1 h. The product was concentrated under reduced pressure and reprecipitated with  $\text{CH}_3\text{OH}/\text{Et}_2\text{O}$  to afford  $1 \cdot \beta\text{Glc}^{\text{Me}}$  as a yellow solid (0.29 mg, 0.064  $\mu\text{mol}$ , 81%). The obtained host-guest complex was redissolved in  $\text{D}_2\text{O}$ .  $1 \cdot \beta\text{Glc}^{\text{Me}}$  is stable enough even under high dilution conditions ( $\sim 2.5 \mu\text{M}$ ). The exact binding constant ( $K_a$ ) could not be estimated by the NMR measurement because the proton signals derived from empty **1** and free  $\beta\text{Glc}^{\text{Me}}$  (less than 5%) were not observed under the conditions. Thus, the  $K_a$  value ( $= [\mathbf{1} \cdot \beta\text{Glc}^{\text{Me}}]/([\mathbf{1}] \cdot [\beta\text{Glc}^{\text{Me}}])$ ) was roughly estimated to be  $>10^8 \text{ M}^{-1}$ .<sup>[S4, S5]</sup>

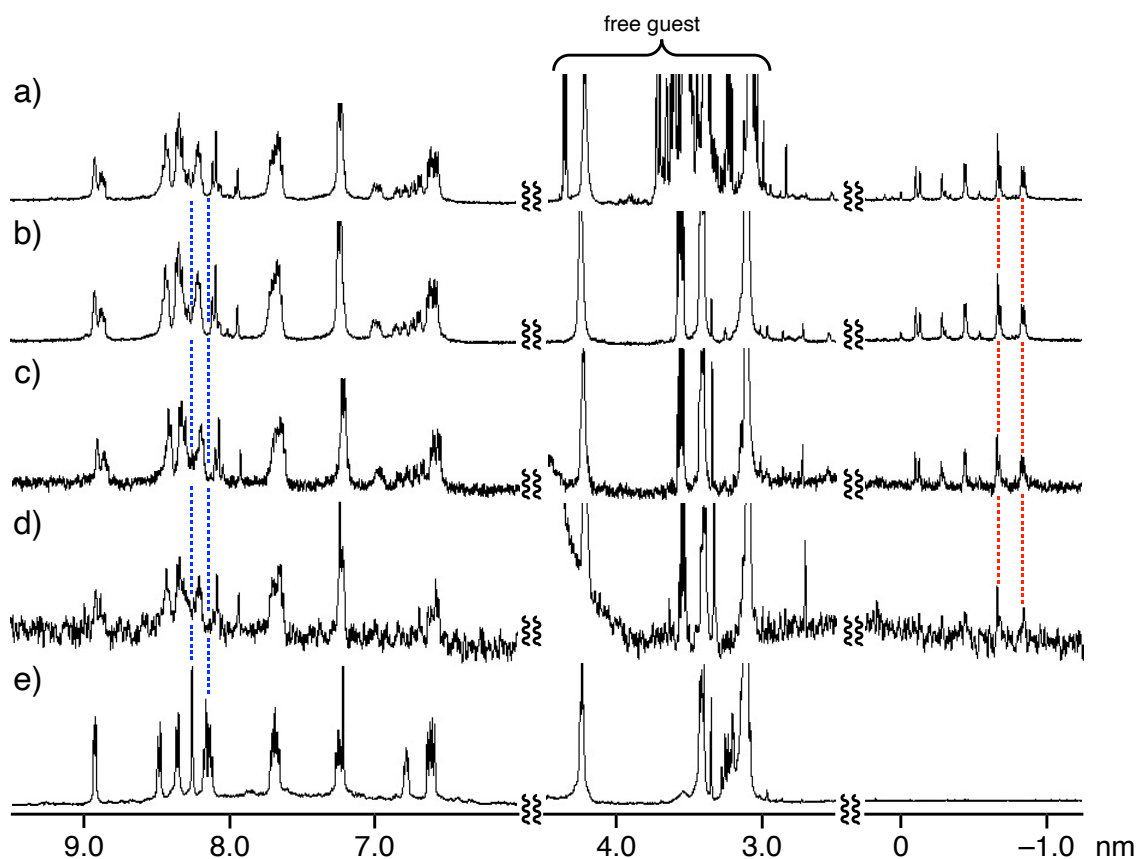

**Figure S27.** a)  $^1\text{H}$  NMR spectrum (500 MHz,  $\text{D}_2\text{O}$ , r.t.) of  $1 \cdot \beta\text{Glc}^{\text{Me}}$  before isolation. Concentration-dependent  $^1\text{H}$  NMR spectra (500 MHz,  $\text{D}_2\text{O}$ , r.t.) of isolated  $1 \cdot \beta\text{Glc}^{\text{Me}}$  at b) 130  $\mu\text{M}$ , c) 13  $\mu\text{M}$ , and d) 2.5  $\mu\text{M}$ . e)  $^1\text{H}$  NMR spectrum (500 MHz,  $\text{D}_2\text{O}$ , r.t.) of empty capsule **1** (red dash lines: bound  $\beta\text{Glc}^{\text{Me}}$ , blue dash lines: empty **1**).

## Competitive binding experiments

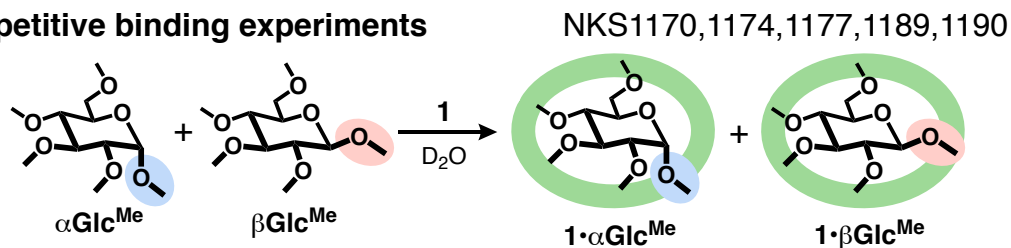

Capsule **1** (0.43 mg, 0.10  $\mu\text{mol}$ ),  $\alpha\text{Glc}^{\text{Me}}$  (50  $\mu\text{g}$ , 0.20  $\mu\text{mol}$  (via a stock solution)),  $\beta\text{Glc}^{\text{Me}}$  (50  $\mu\text{g}$ , 0.20  $\mu\text{mol}$  (via a stock solution)), and  $\text{D}_2\text{O}$  (0.5 mL) were added to a glass test tube. The mixture was stirred at 80  $^\circ\text{C}$  for 10 min. The formation and product ratio of  $1\cdot\alpha\text{Glc}^{\text{Me}}$  and  $1\cdot\beta\text{Glc}^{\text{Me}}$  (19:81) were confirmed by  $^1\text{H}$  NMR analysis. Various binding experiments were examined in the same way. Similarly, capsule **1** (0.43 mg, 0.10  $\mu\text{mol}$ ),  $\alpha\text{Glc}^{\text{Me}}$  (50  $\mu\text{g}$ , 0.20  $\mu\text{mol}$ ),  $\beta\text{Glc}^{\text{Me}}$  (50  $\mu\text{g}$ , 0.20  $\mu\text{mol}$ ), and  $\text{D}_2\text{O}$  (0.5 mL) were added to a glass test tube. The mixture was stirred at 40  $^\circ\text{C}$  for 2 h. The formation and product ratio of  $1\cdot\alpha\text{Glc}^{\text{Me}}$  and  $1\cdot\beta\text{Glc}^{\text{Me}}$  (18:82) were confirmed by  $^1\text{H}$  NMR analysis.

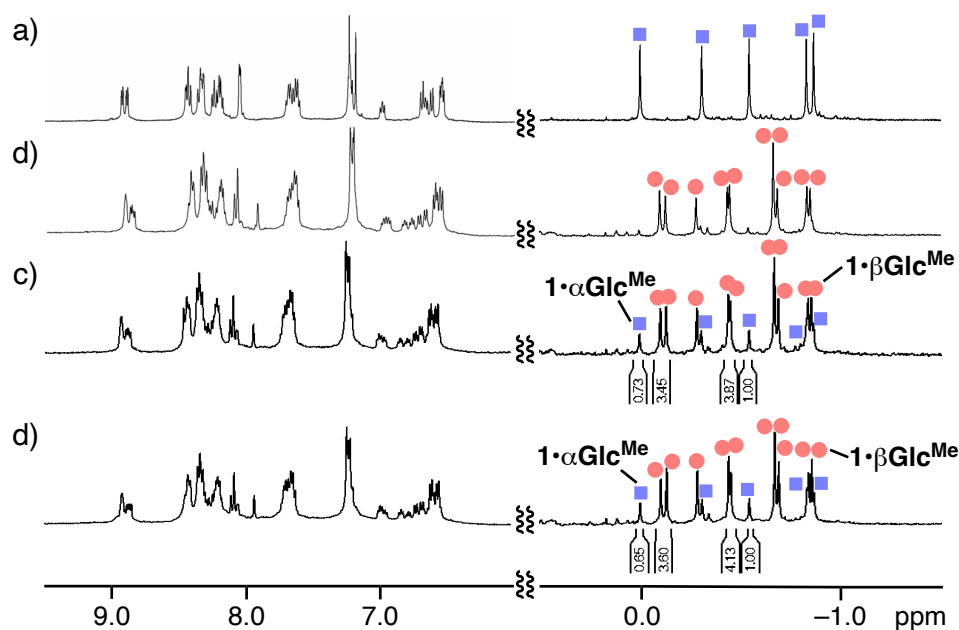

**Figure S28.** Competitive binding experiment of **1** with  $\alpha\text{Glc}^{\text{Me}}$  and  $\beta\text{Glc}^{\text{Me}}$  in water.  $^1\text{H}$  NMR spectra (500 MHz,  $\text{D}_2\text{O}$ , r.t.) of a)  $1\cdot\alpha\text{Glc}^{\text{Me}}$ , b)  $1\cdot\beta\text{Glc}^{\text{Me}}$ , and products after mixing  $\alpha\text{Glc}^{\text{Me}}$ ,  $\beta\text{Glc}^{\text{Me}}$ , and **1** at c) 80  $^\circ\text{C}$  and d) 40  $^\circ\text{C}$ .



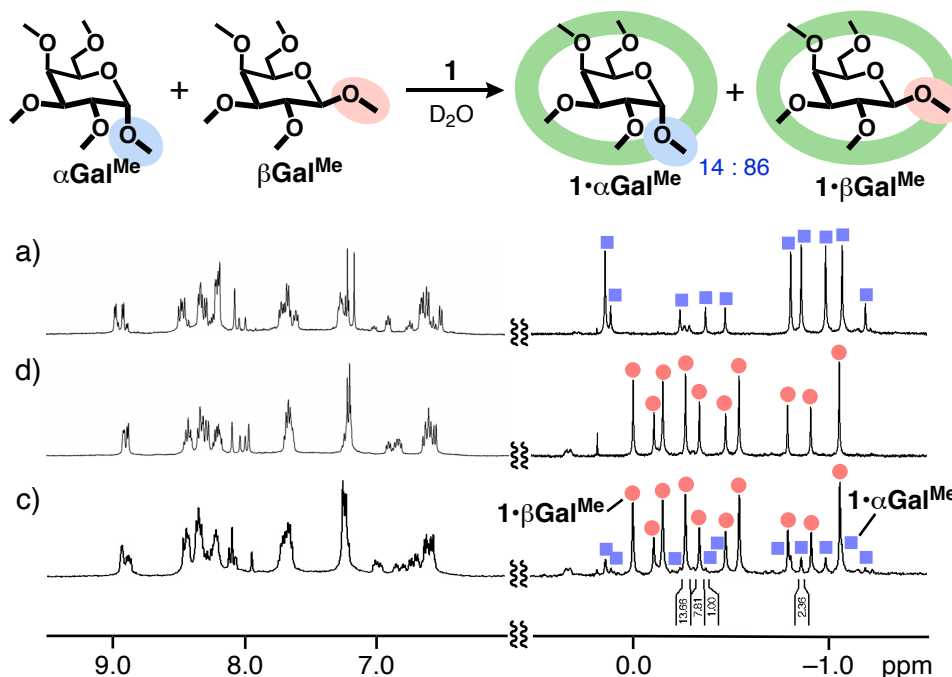

**Figure S29.** Competitive binding experiment of **1** with  $\alpha\text{Gal}^{\text{Me}}$  and  $\beta\text{Gal}^{\text{Me}}$  in water.  $^1\text{H}$  NMR spectra (500 MHz,  $\text{D}_2\text{O}$ , r.t.) of a)  $1\cdot\alpha\text{Gal}^{\text{Me}}$ , b)  $1\cdot\beta\text{Gal}^{\text{Me}}$ , and c) products after mixing  $\alpha\text{Gal}^{\text{Me}}$ ,  $\beta\text{Gal}^{\text{Me}}$ , and **1**.

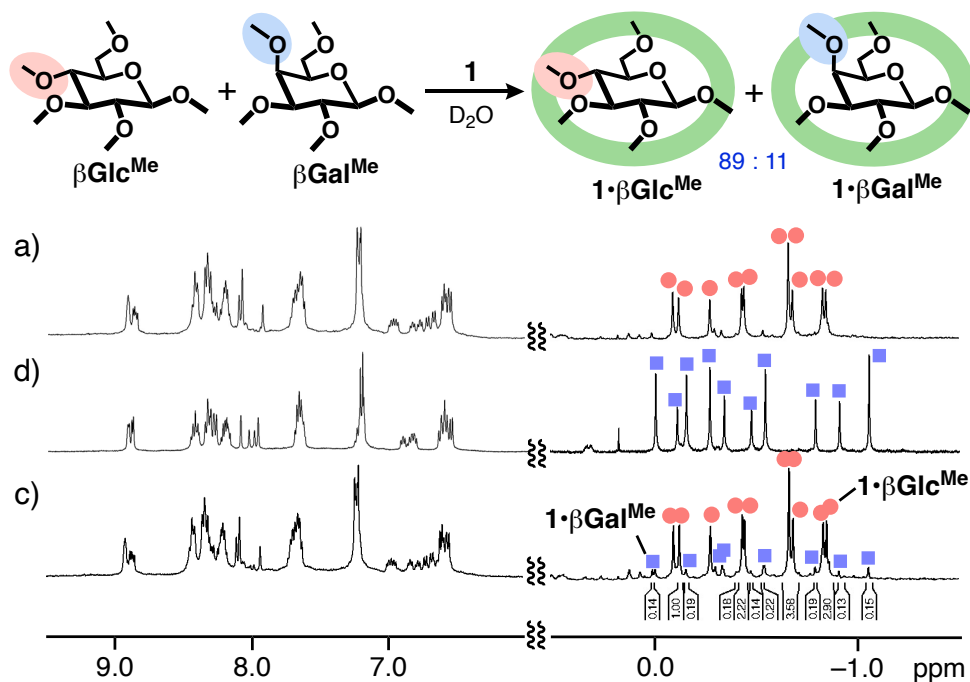

**Figure S30.** Competitive binding experiment of **1** with  $\beta\text{Glc}^{\text{Me}}$  and  $\beta\text{Gal}^{\text{Me}}$  in water.  $^1\text{H}$  NMR spectra (500 MHz,  $\text{D}_2\text{O}$ , r.t.) of a)  $1\cdot\beta\text{Glc}^{\text{Me}}$ , b)  $1\cdot\beta\text{Gal}^{\text{Me}}$ , and c) products after mixing  $\beta\text{Glc}^{\text{Me}}$ ,  $\beta\text{Gal}^{\text{Me}}$ , and **1**.

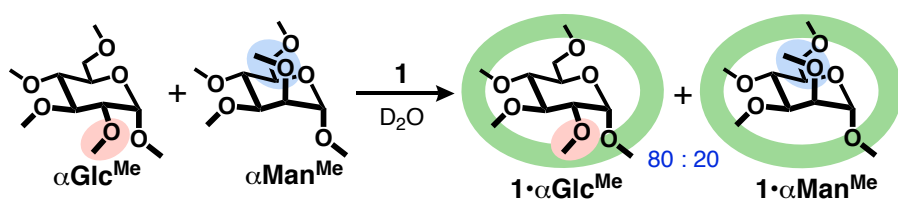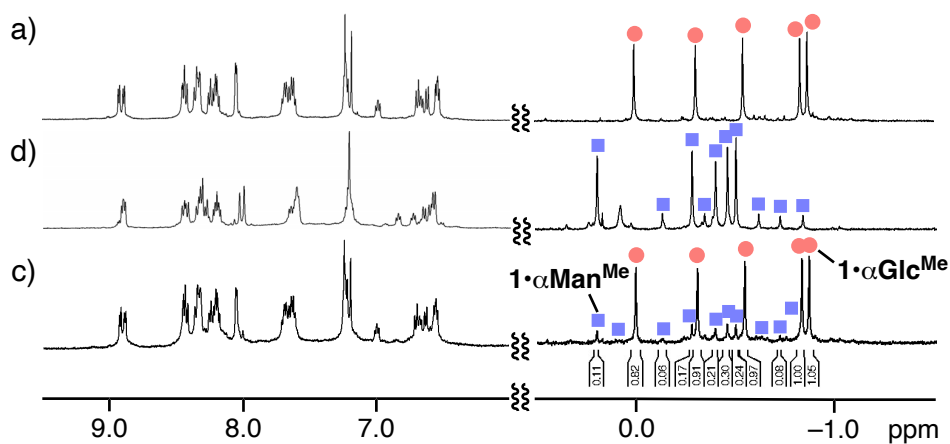

**Figure S31.** Competitive binding experiment of **1** with  $\alpha\text{Glc}^{\text{Me}}$  and  $\alpha\text{Man}^{\text{Me}}$  in water.  $^1\text{H}$  NMR spectra (500 MHz,  $\text{D}_2\text{O}$ , r.t.) of a)  $1\cdot\alpha\text{Glc}^{\text{Me}}$ , b)  $1\cdot\alpha\text{Man}^{\text{Me}}$ , and c) products after mixing  $\alpha\text{Glc}^{\text{Me}}$ ,  $\alpha\text{Man}^{\text{Me}}$ , and **1**.

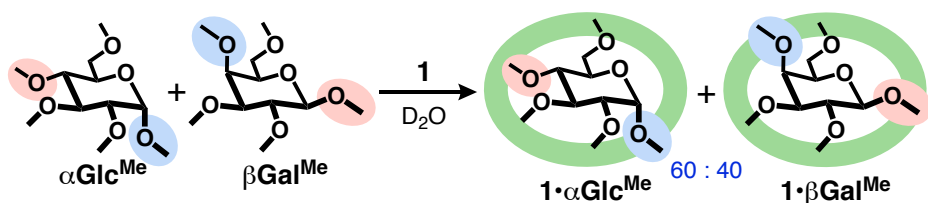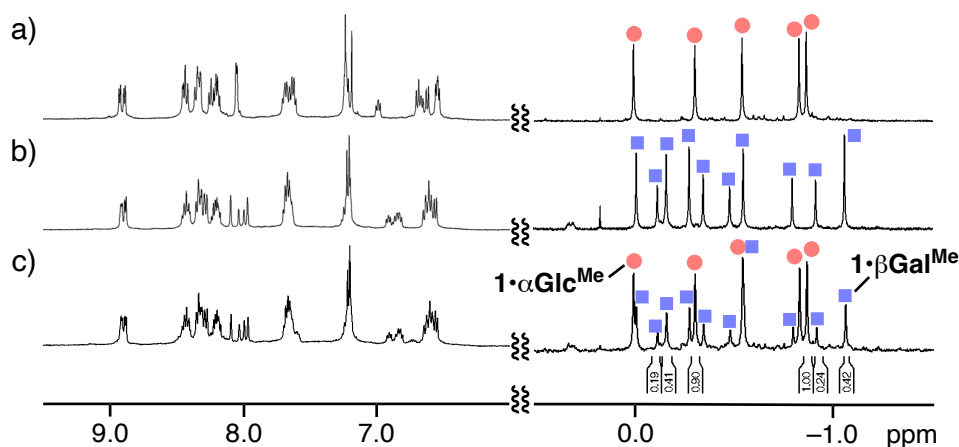

**Figure S32.** Competitive binding experiment of **1** with  $\alpha\text{Glc}^{\text{Me}}$  and  $\beta\text{Gal}^{\text{Me}}$  in water.  $^1\text{H}$  NMR spectra (500 MHz,  $\text{D}_2\text{O}$ , r.t.) of a)  $1\cdot\alpha\text{Glc}^{\text{Me}}$ , b)  $1\cdot\beta\text{Gal}^{\text{Me}}$ , and c) products after mixing  $\alpha\text{Glc}^{\text{Me}}$ ,  $\beta\text{Gal}^{\text{Me}}$ , and **1**.

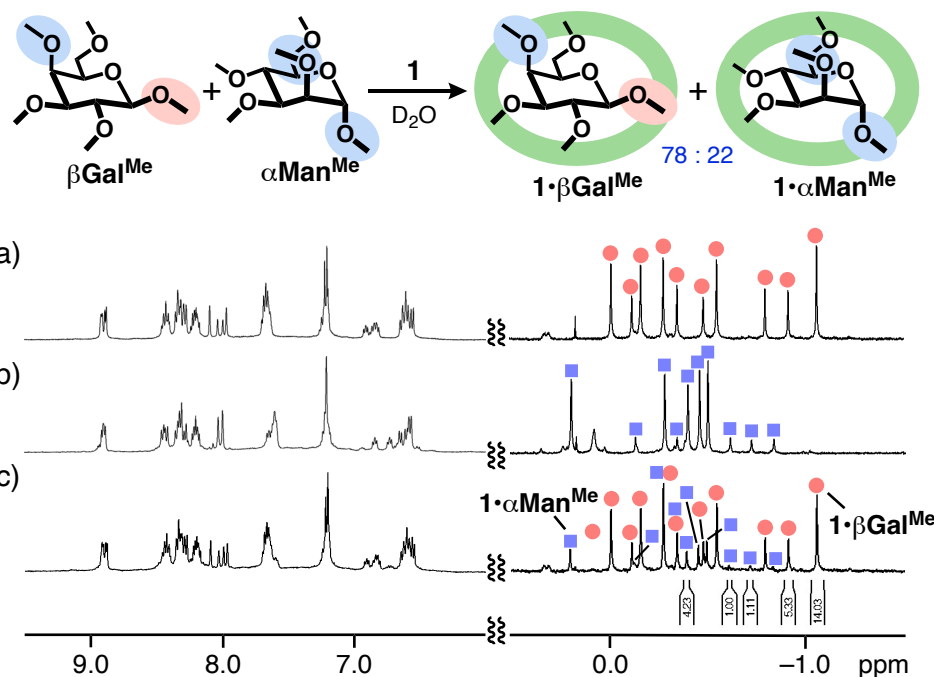

**Figure S33.** Competitive binding experiment of **1** with  $\beta\text{Gal}^{\text{Me}}$  and  $\alpha\text{Man}^{\text{Me}}$  in water.  $^1\text{H}$  NMR spectra (500 MHz,  $\text{D}_2\text{O}$ , r.t.) of a)  $1\cdot\beta\text{Gal}^{\text{Me}}$ , b)  $1\cdot\alpha\text{Man}^{\text{Me}}$ , and c) products after mixing  $\beta\text{Gal}^{\text{Me}}$ ,  $\alpha\text{Man}^{\text{Me}}$ , and **1**.

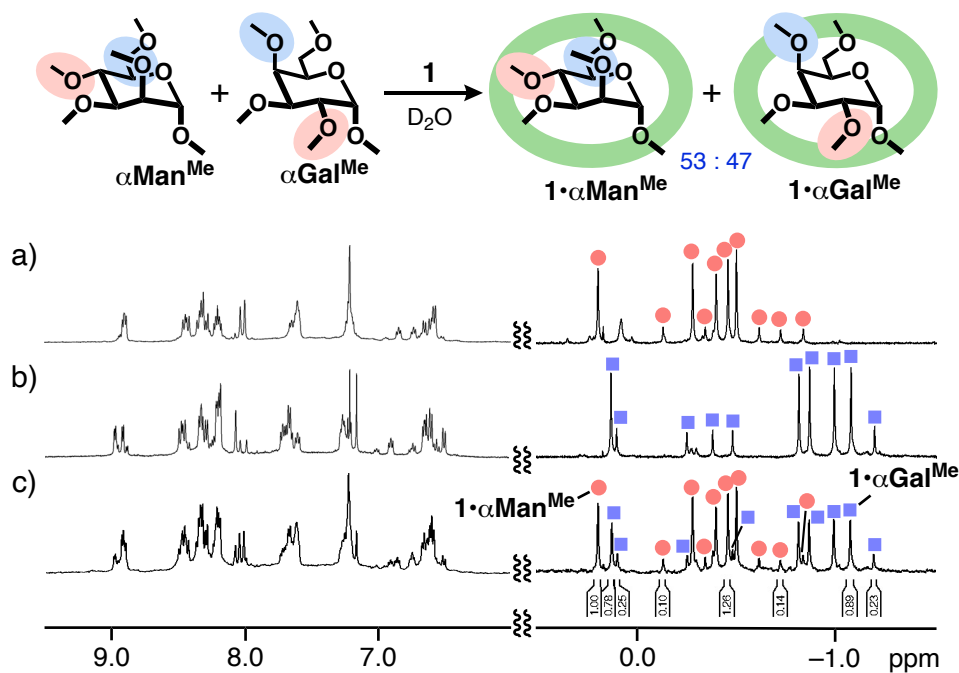

**Figure S34.** Competitive binding experiment of **1** with  $\alpha\text{Man}^{\text{Me}}$  and  $\alpha\text{Gal}^{\text{Me}}$  in water.  $^1\text{H}$  NMR spectra (500 MHz,  $\text{D}_2\text{O}$ , r.t.) of a)  $1\cdot\alpha\text{Man}^{\text{Me}}$ , b)  $1\cdot\alpha\text{Gal}^{\text{Me}}$ , and c) products after mixing  $\alpha\text{Man}^{\text{Me}}$ ,  $\alpha\text{Gal}^{\text{Me}}$ , and **1**.

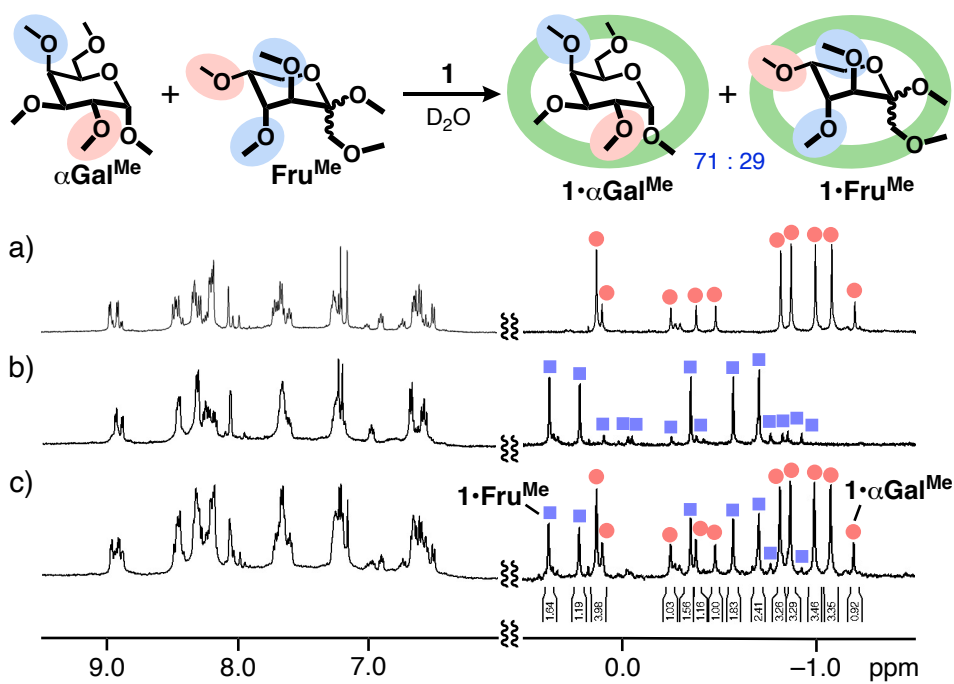

**Figure S35.** Competitive binding experiment of **1** with  $\alpha\text{Gal}^{\text{Me}}$  and  $\text{Fru}^{\text{Me}}$  in water.  $^1\text{H}$  NMR spectra (500 MHz,  $\text{D}_2\text{O}$ , r.t.) of a)  $1 \cdot \alpha\text{Gal}^{\text{Me}}$ , b)  $1 \cdot \text{Fru}^{\text{Me}}$ , and c) products after mixing  $\alpha\text{Gal}^{\text{Me}}$ ,  $\text{Fru}^{\text{Me}}$ , and **1**.

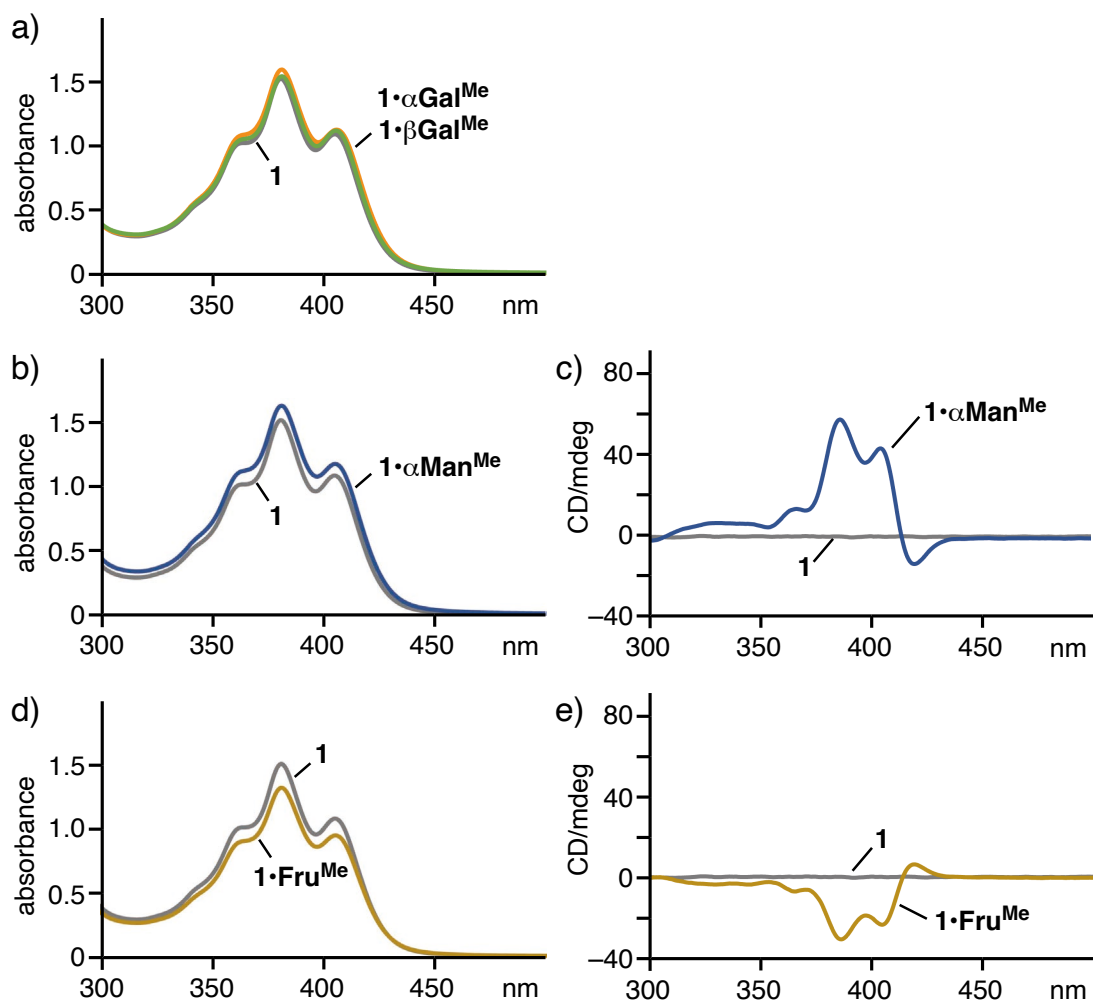

**Figure S36.** UV-visible spectra (water, r.t., 0.2 mM based on **1**) of a) **1**· $\alpha$ Gal<sup>Me</sup>, **1**· $\beta$ Gal<sup>Me</sup>, and **1**. b) UV-visible and c) CD spectra (water, r.t., 0.2 mM based on **1**) of **1**· $\alpha$ Man<sup>Me</sup> and **1**. d) UV-visible and e) CD spectra (water, r.t., 0.2 mM based on **1**) of **1**·Fru<sup>Me</sup> and **1**.

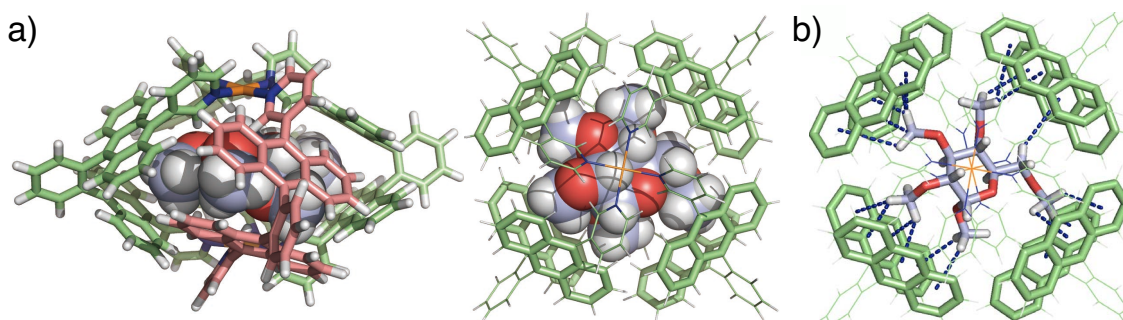

**Figure S37.** a) Optimized structure of (*P*)-**1**· $\alpha$ Glc<sup>Me</sup> (side and top views; R = -H for clarity) and b) the highlighted host (anthracene panels)-guest (methyl groups) CH- $\pi$  interactions in the cavity (dashed blue lines:  $\leq 3.6$  Å).

**Table S1.** Energy changes ( $\Delta E_{1\cdot\alpha\text{Glc}^{\text{Me}}} = E_{1\cdot\alpha\text{Glc}^{\text{Me}}} - (E_1 + E_{\alpha\text{Glc}^{\text{Me}}})$  kJ/mol) of capsule **1** (R = H) before and after the encapsulation of  $\alpha\text{Glc}^{\text{Me}}$ , calculated by the CAM-B3LYP+D3BJ/LanL2DZ, 3-21G, PCM (H<sub>2</sub>O) method.

|                        | $E_1$       | $E_{\alpha\text{Glc}^{\text{Me}}}$ | $E_{1\cdot\alpha\text{Glc}^{\text{Me}}}$ | $\Delta E_{1\cdot\alpha\text{Glc}^{\text{Me}}}$ |
|------------------------|-------------|------------------------------------|------------------------------------------|-------------------------------------------------|
| ( <i>P</i> )- <b>1</b> | -19486842.5 | -2306454.0                         | -21793771.8                              | -475.2                                          |
| ( <i>M</i> )- <b>1</b> |             |                                    | -21793736.8                              | -440.3                                          |

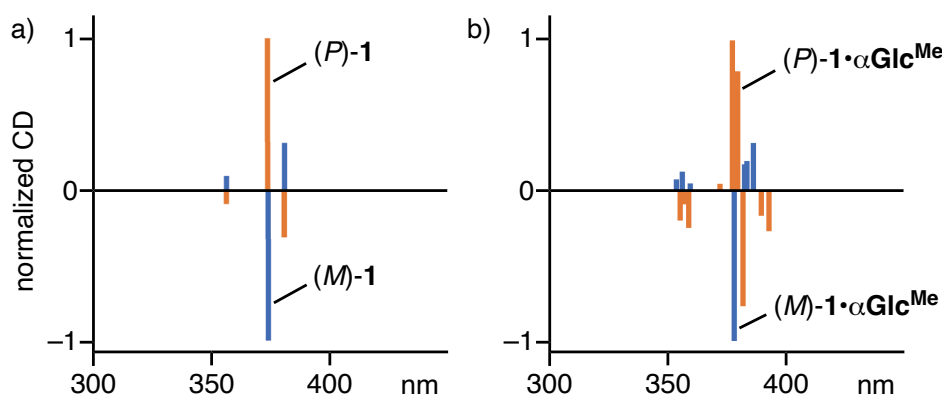

**Figure S38.** a) Theoretical CD spectra of a) capsules (*P*)/(*M*)-**1** and b) host-guest complexes (*P*)/(*M*)-**1**· $\alpha\text{Glc}^{\text{Me}}$  calculated by TD-DFT methods (R = H; CAM-B3LYP+D3BJ/LanL2DZ (Pd), 6-31G(d,p) (others), PCM (water) level of theory).

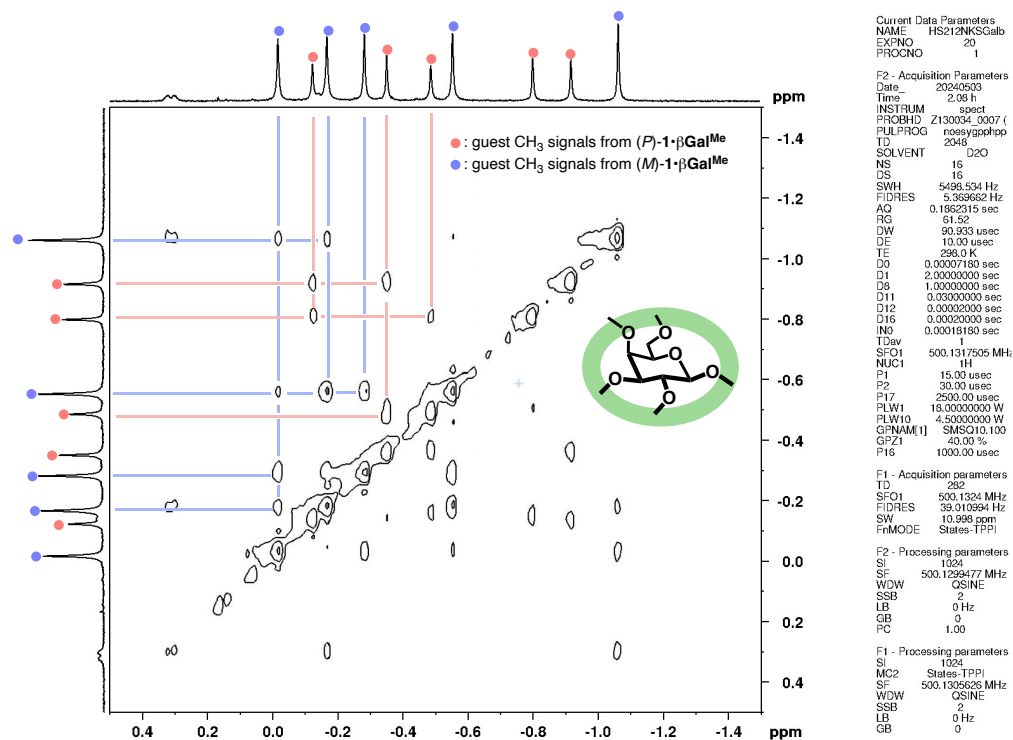

**Figure S39a.** <sup>1</sup>H-<sup>1</sup>H EXSY NMR spectrum (500 MHz, D<sub>2</sub>O, r.t., mixing time = 1.0 s) of **1**· $\beta\text{Gal}^{\text{Me}}$ .

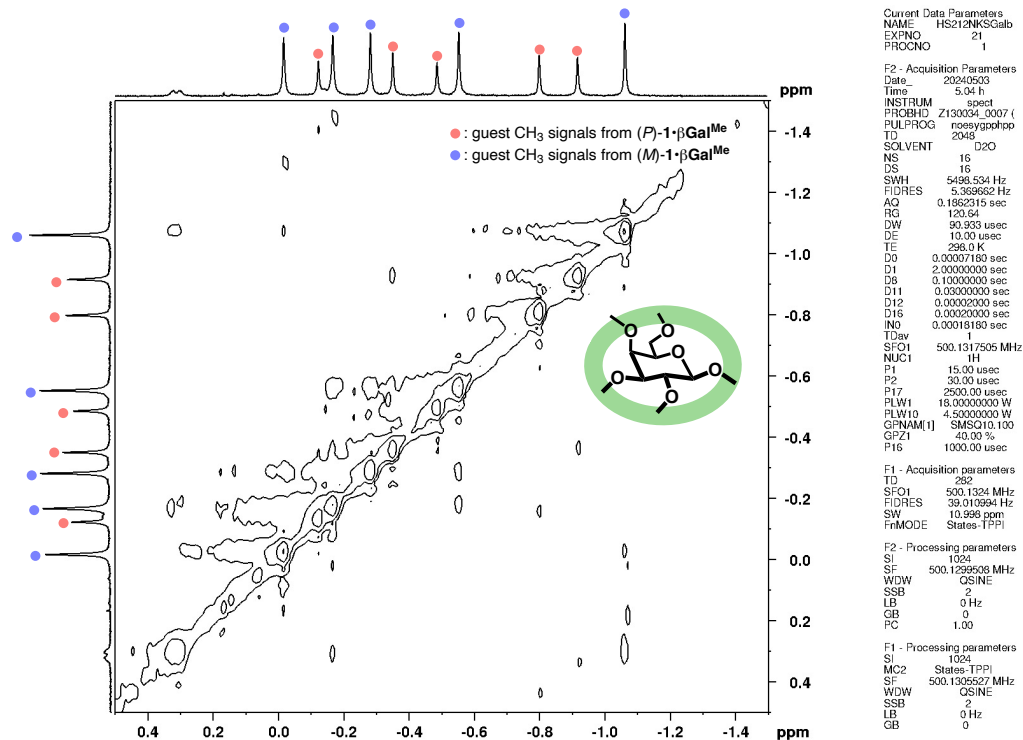

Figure S39b.  $^1\text{H}$ - $^1\text{H}$  EXSY NMR spectrum (500 MHz,  $\text{D}_2\text{O}$ , r.t., mixing time = 0.1 s) of  $1\text{-}\beta\text{GalMe}$ .

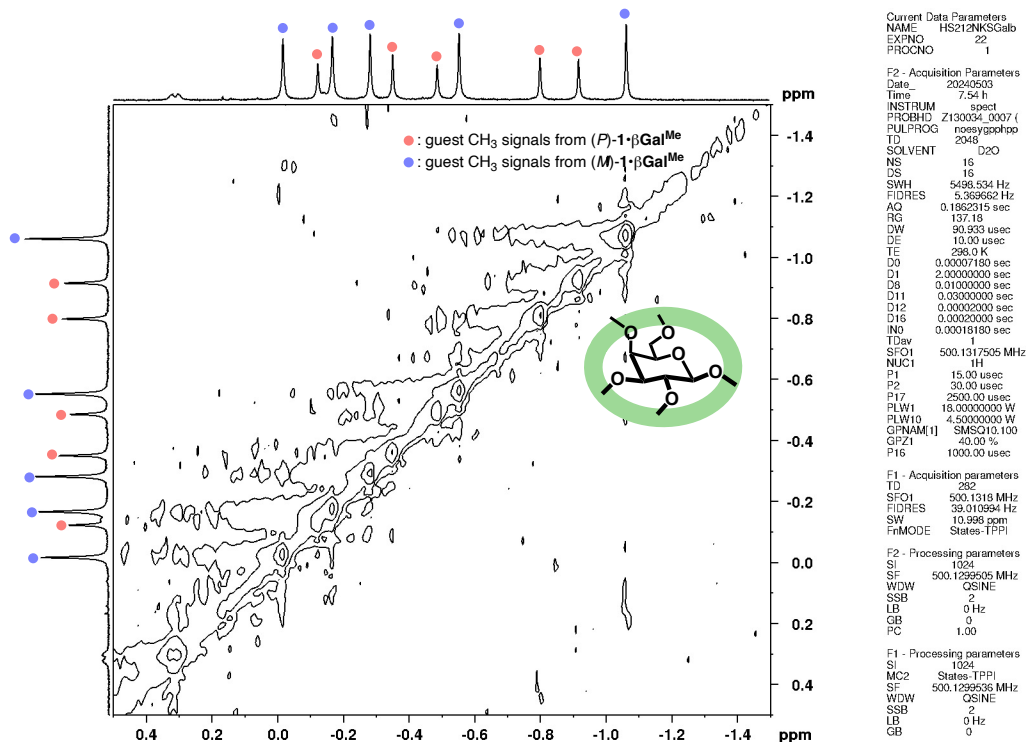

Figure S39c.  $^1\text{H}$ - $^1\text{H}$  EXSY NMR spectrum (500 MHz,  $\text{D}_2\text{O}$ , r.t., mixing time = 0.01 s) of  $1\text{-}\beta\text{GalMe}$ .
